# Supplementary material for: Light–Dark and Activity Rhythm Therapy (L-DART) to Improve Sleep in People with Schizophrenia Spectrum Disorders: A Single-Group Mixed Methods Study of Feasibility, Acceptability and Adherence
Source: Clocks Sleep. 2023 Dec 4;5(4):734–54. doi: 10.3390/clockssleep5040048 (PMC10742153; doi:10.3390/clockssleep5040048)

# Participant 1

Withings step counts

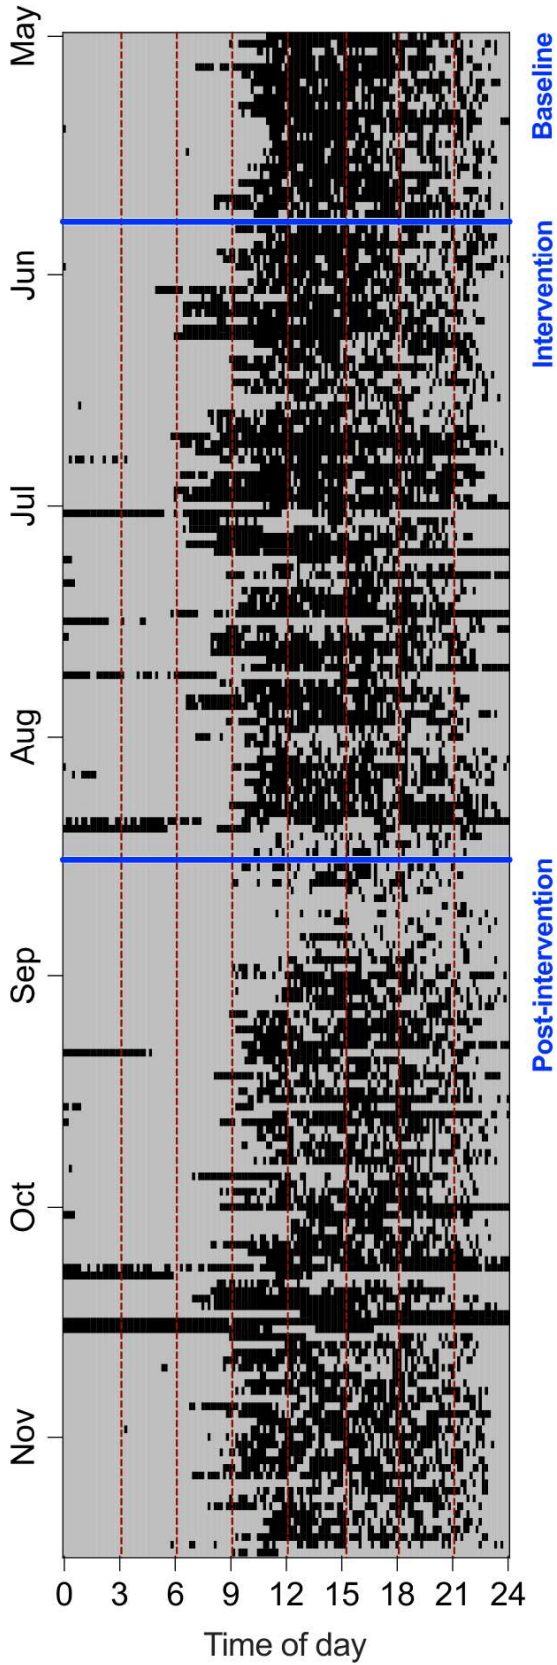

MotionWatch wrist light measurement

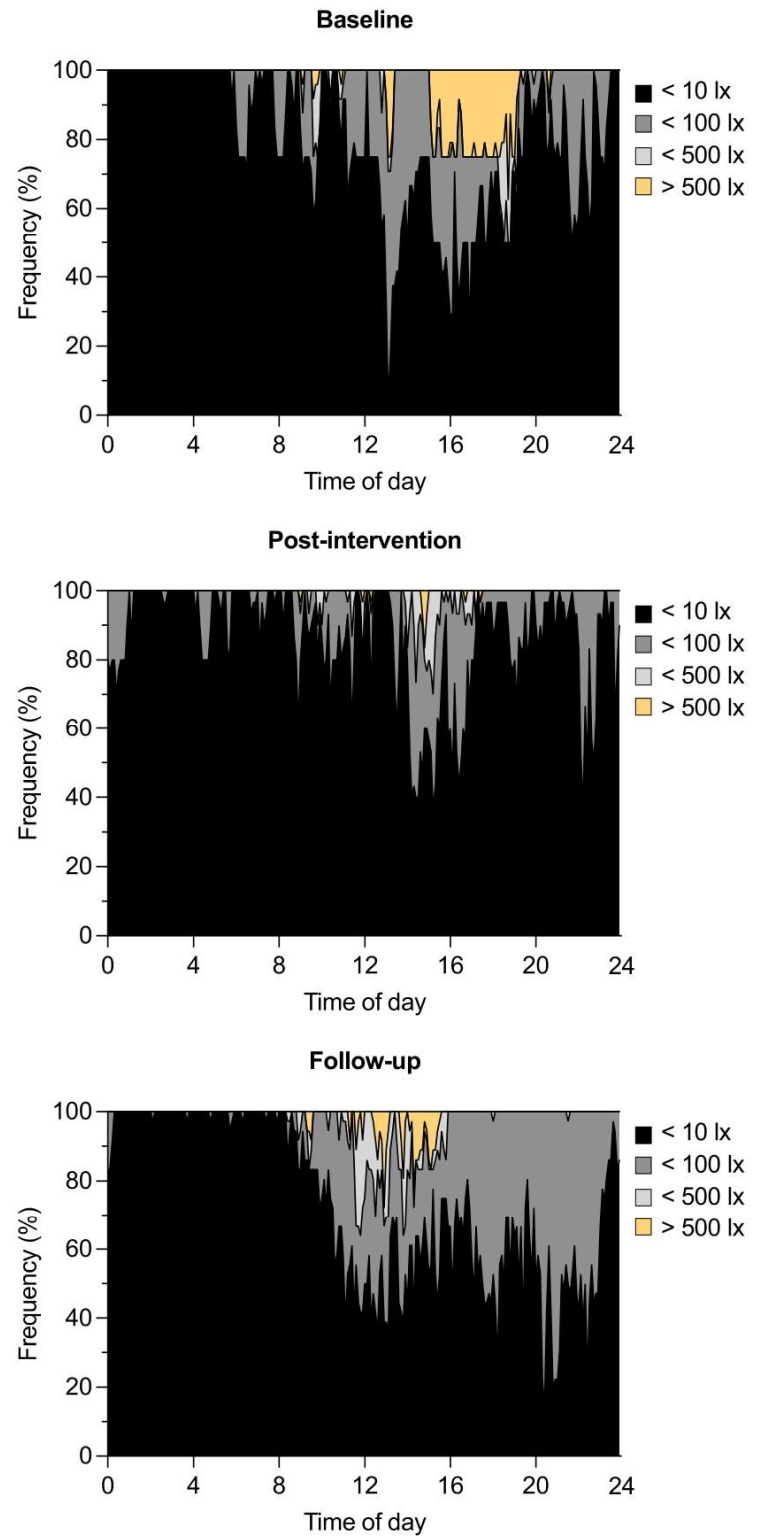

# Participant 1

## Bedroom

### MotionWatch wall measurements

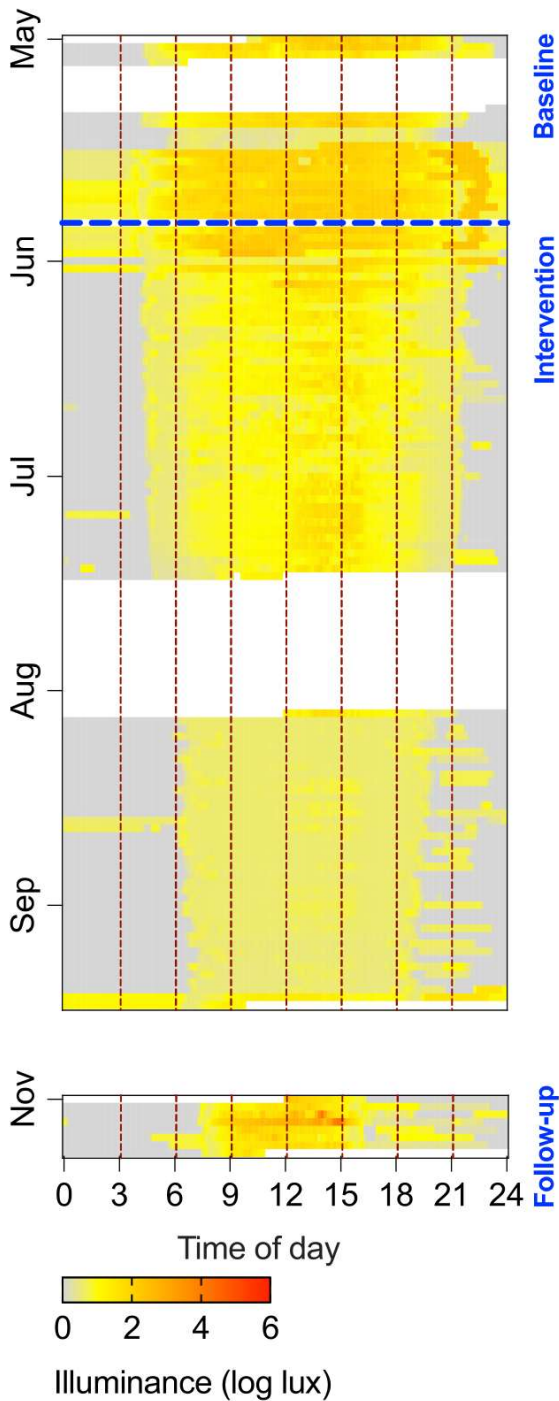

### Baseline

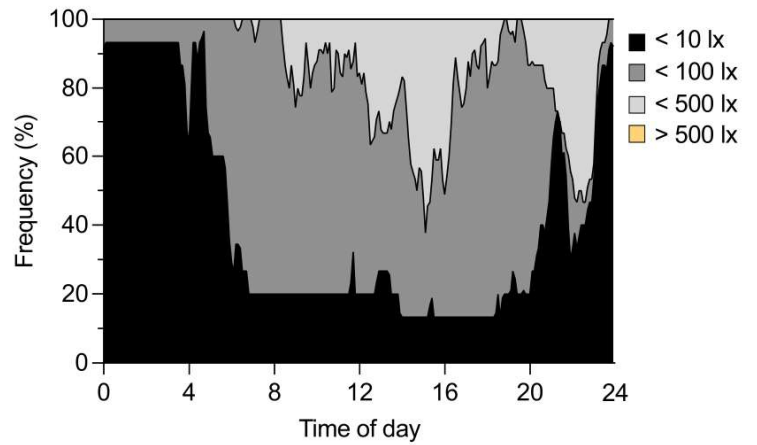

### Intervention

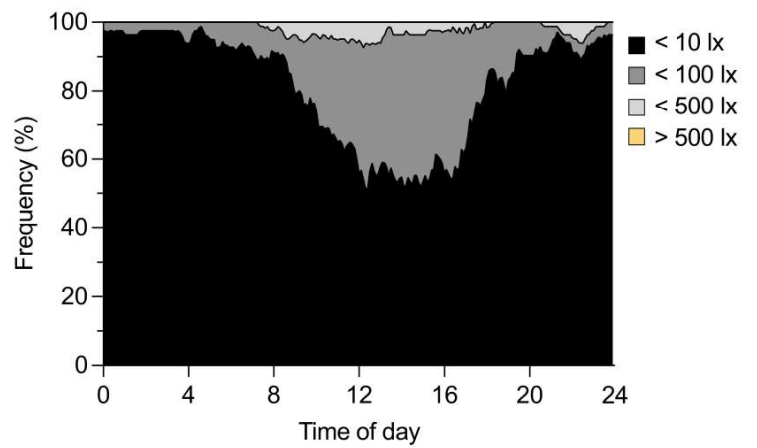

### Follow-up

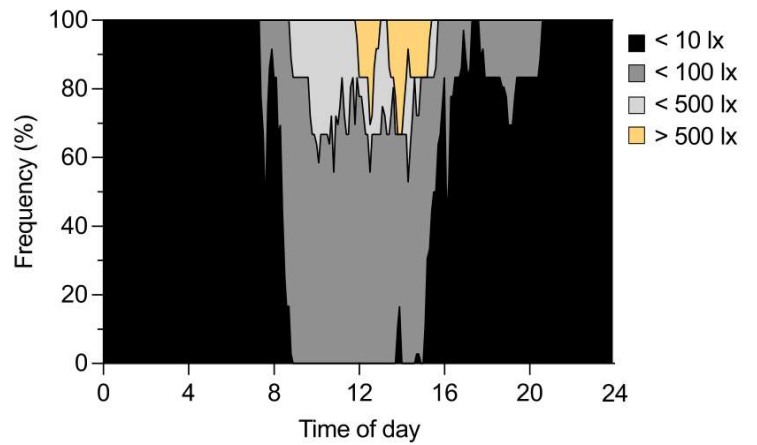

# Participant 1

## Living room

### MotionWatch wall measurements

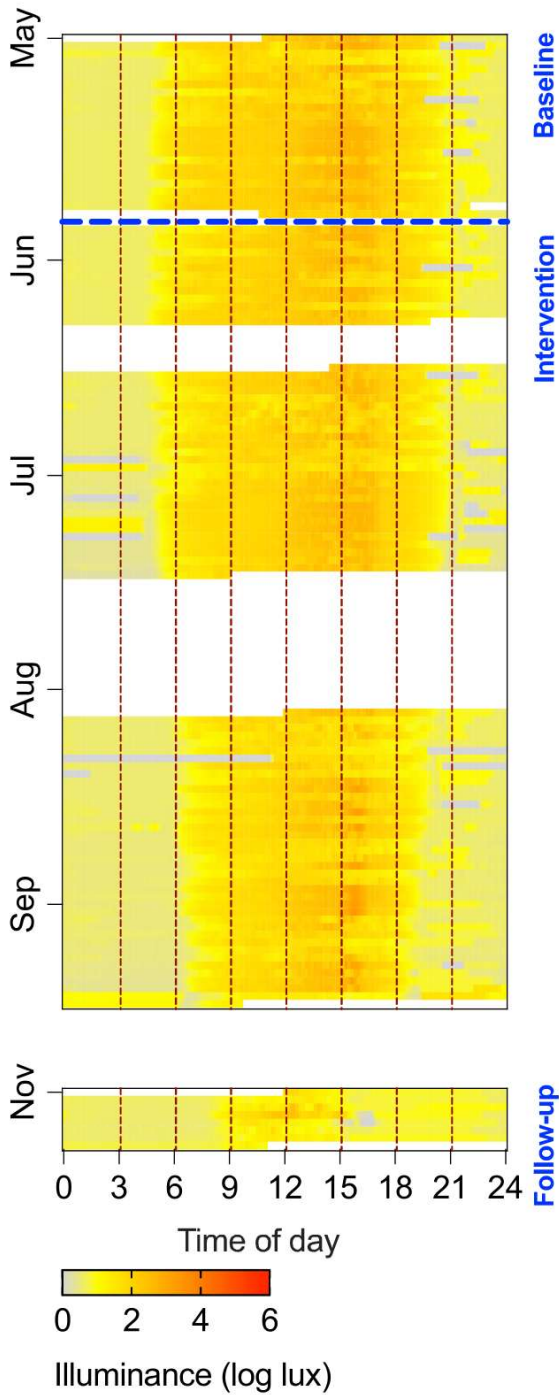

### Baseline

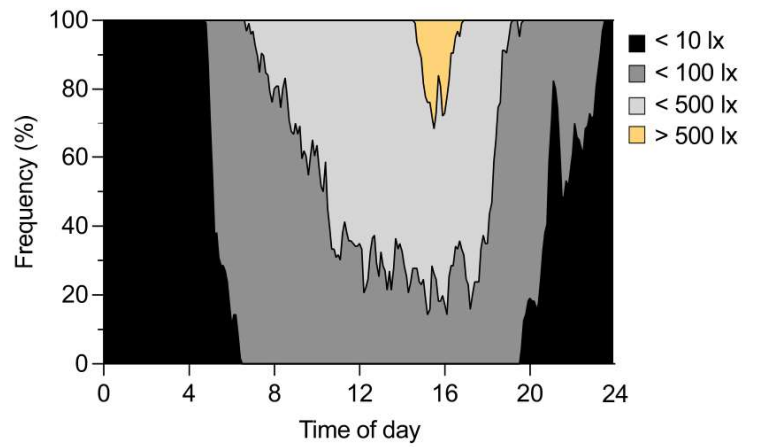

### Intervention

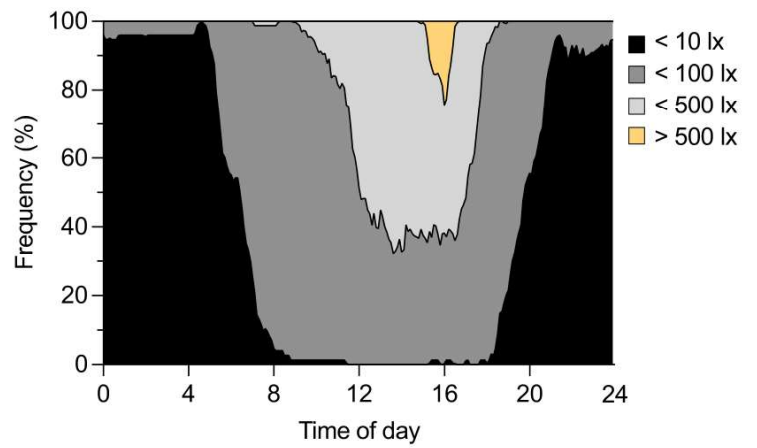

### Follow-up

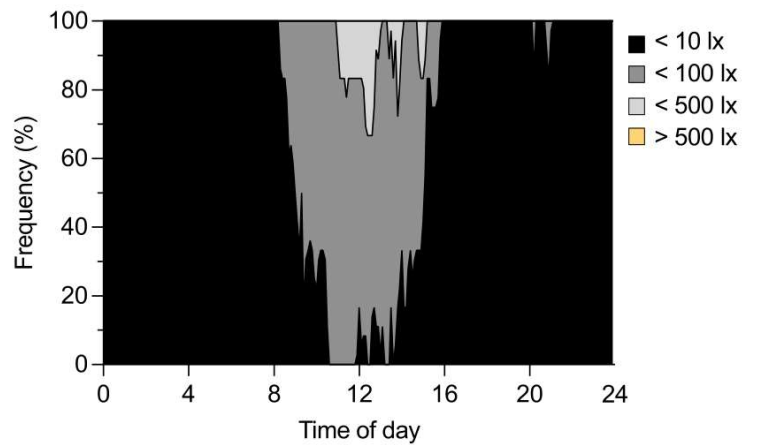

## Participant 2

Withings step counts

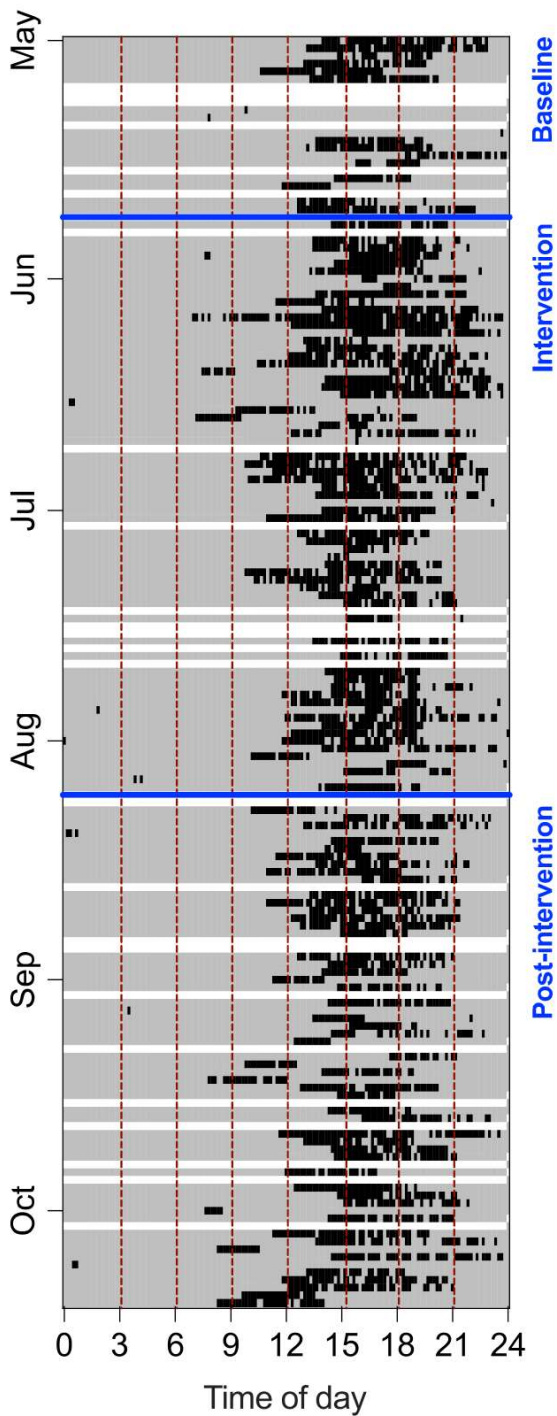

MotionWatch wrist light measurement

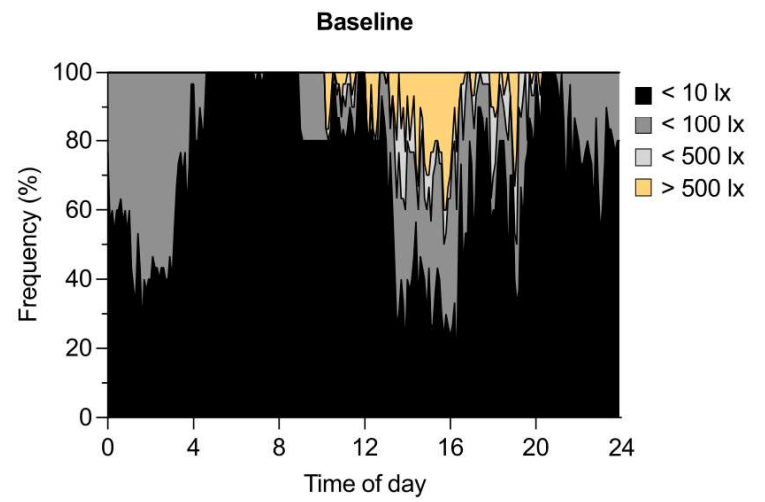

# Participant 2

## Bedroom

MotionWatch wall measurements

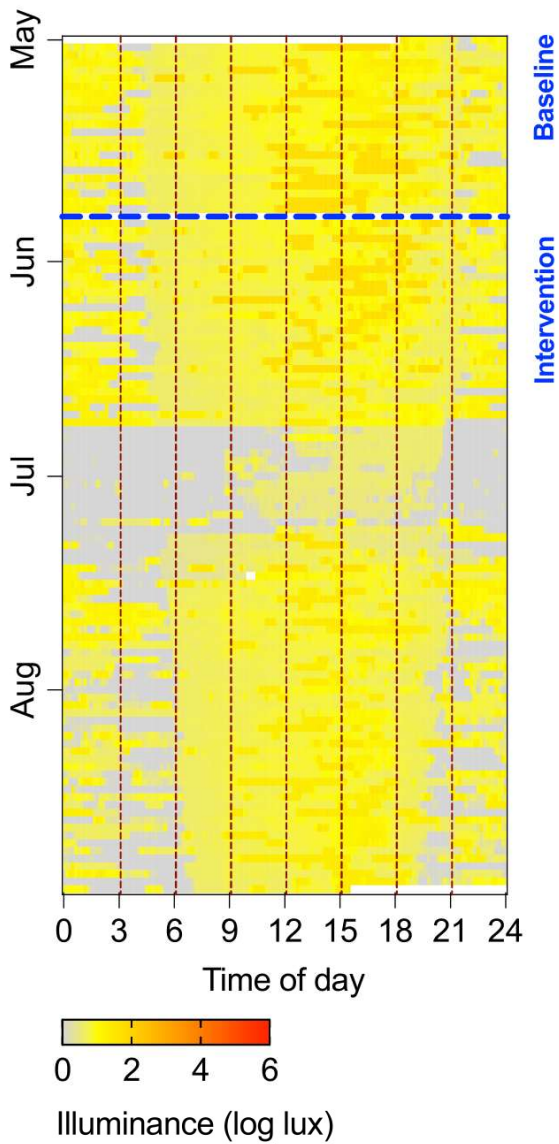

Baseline

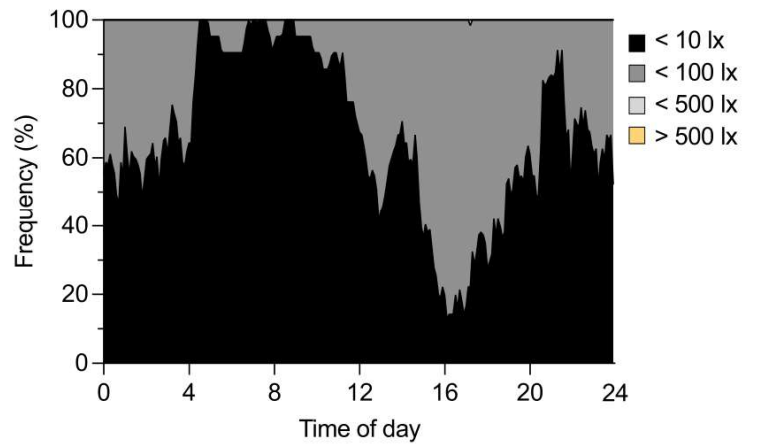

Intervention

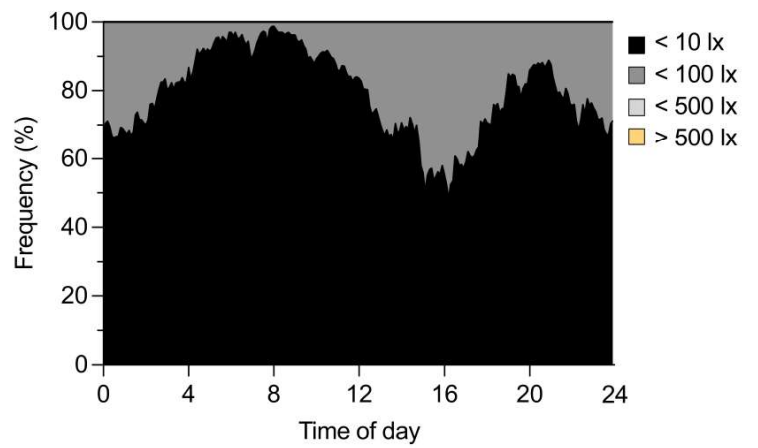

# Participant 2

## Living room

MotionWatch wall measurements

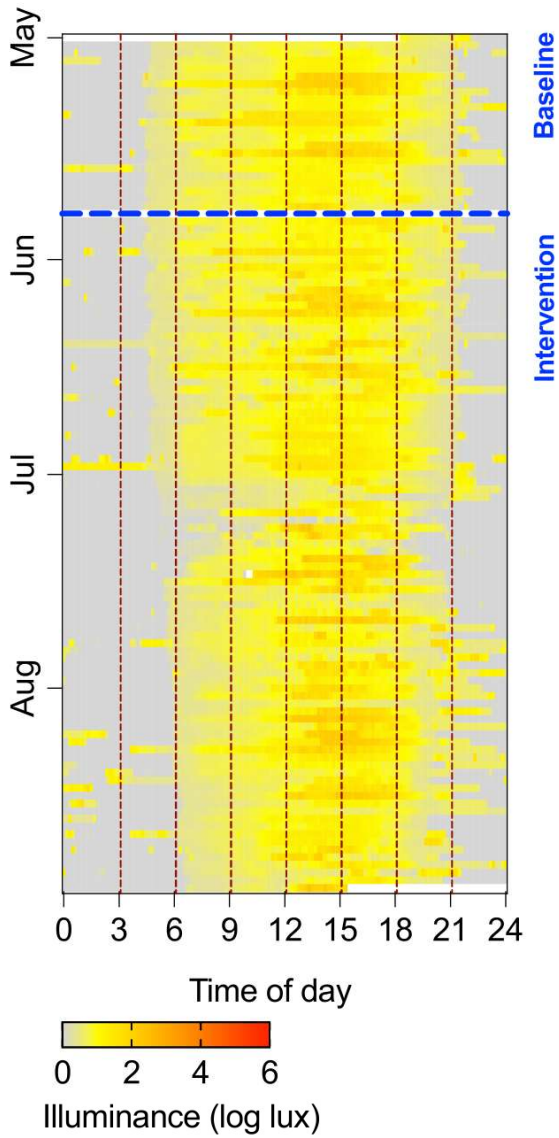

Baseline

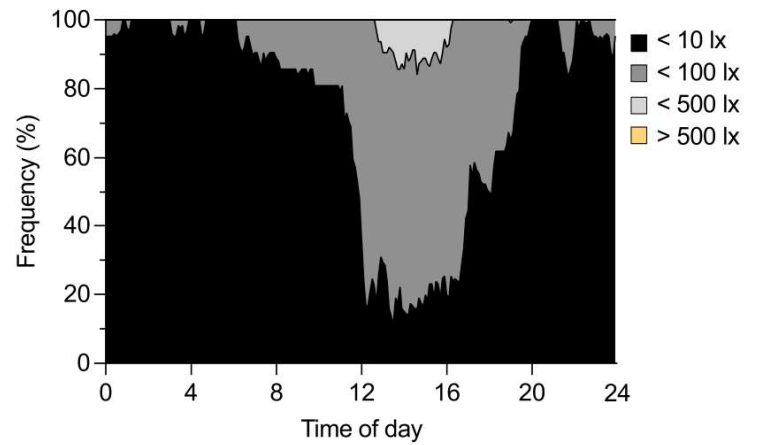

Intervention

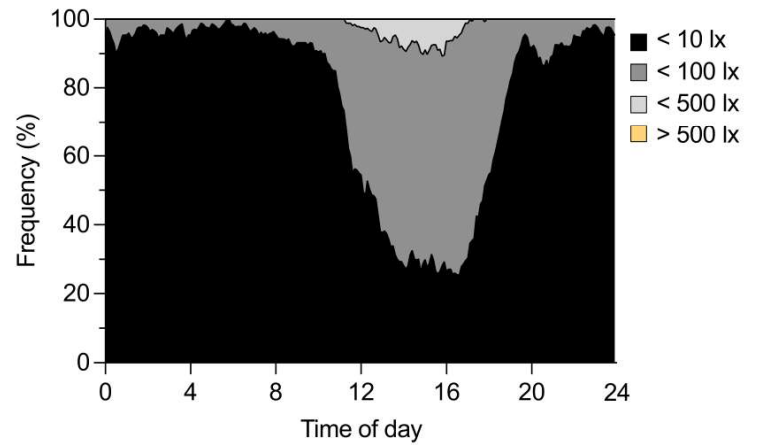

# Participant 3

Withings step counts

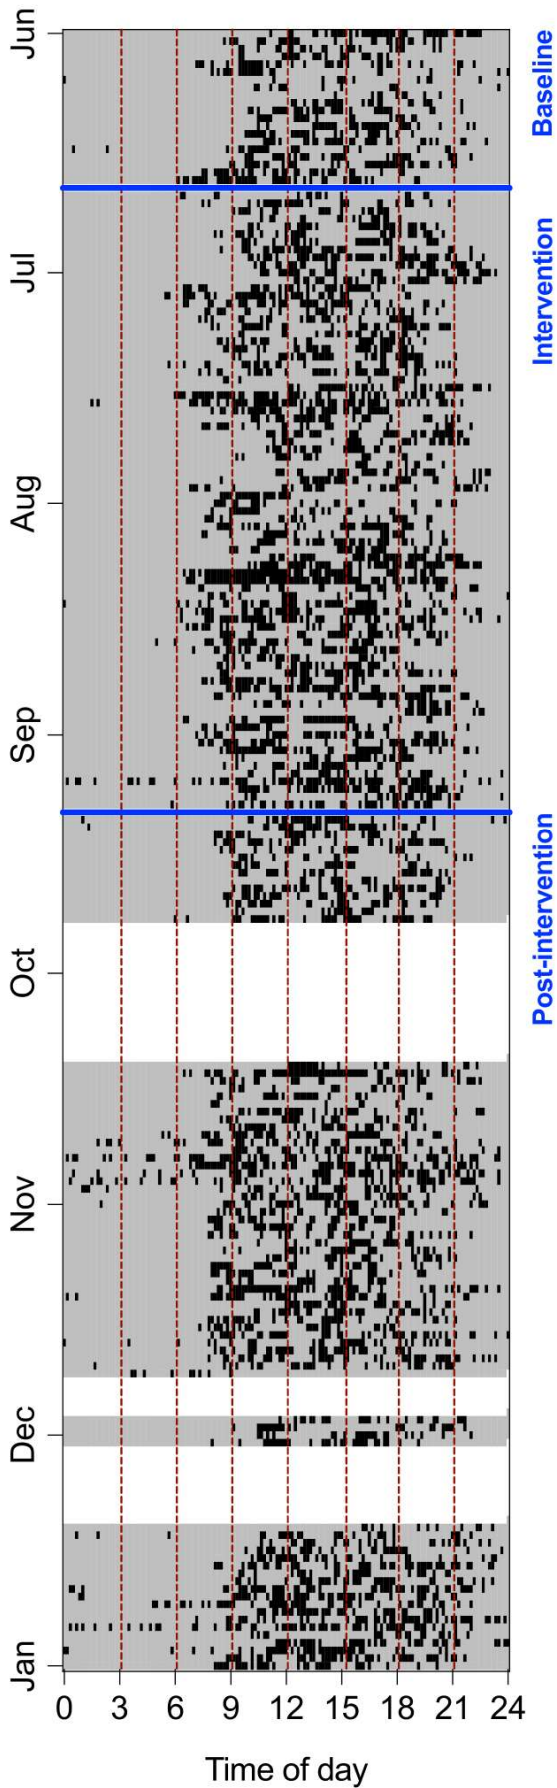

MotionWatch wrist light measurement

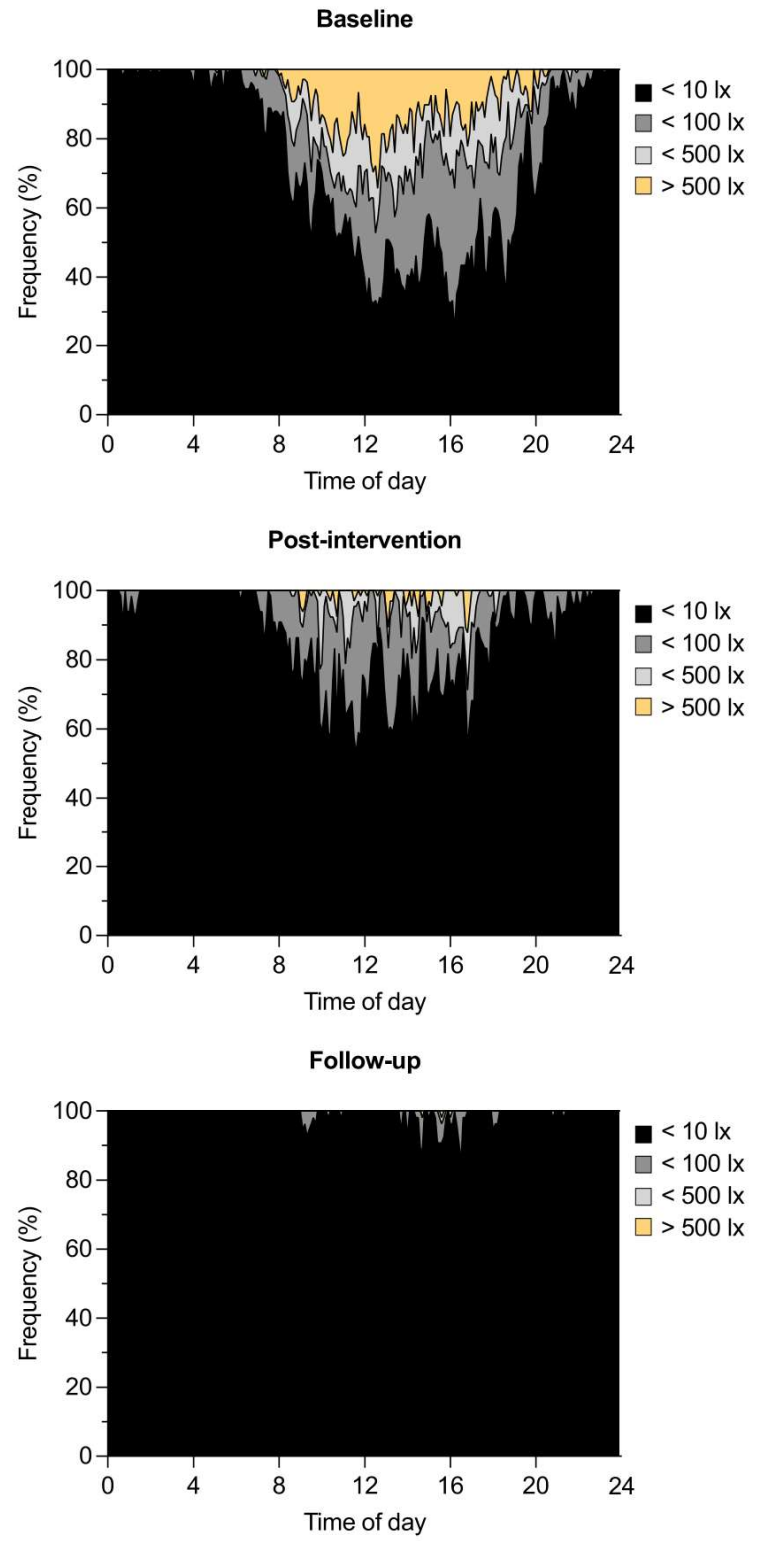

# Participant 3

## Bedroom

### MotionWatch wall measurements

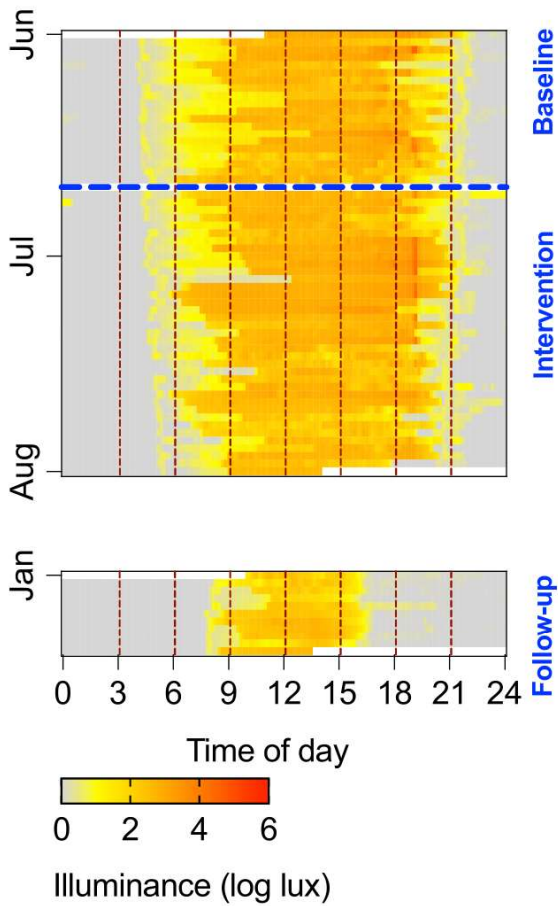

### Baseline

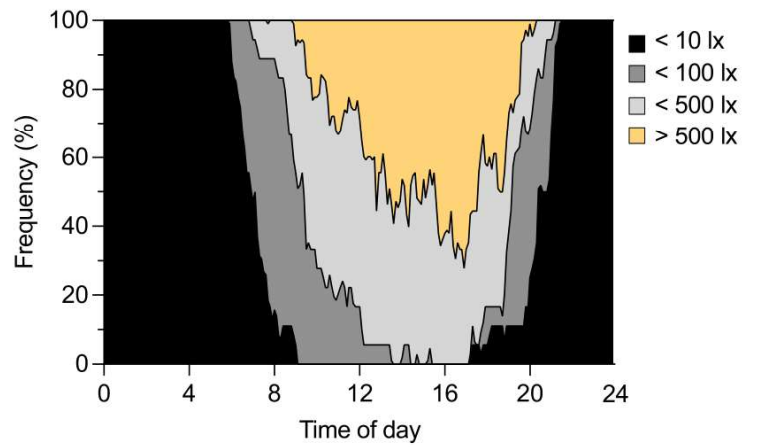

### Intervention

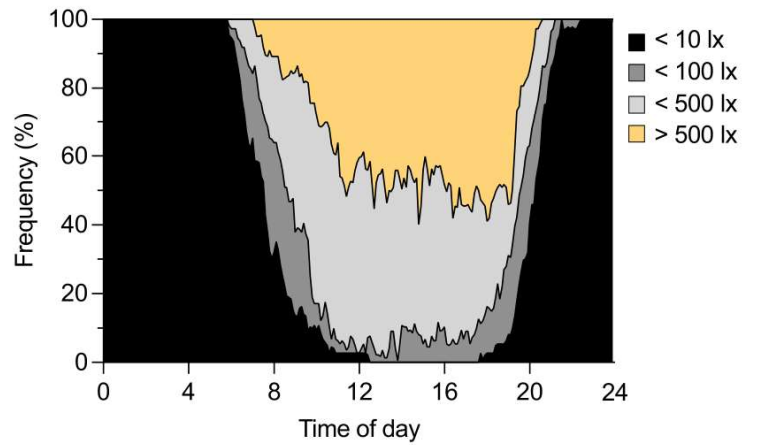

### Follow-up

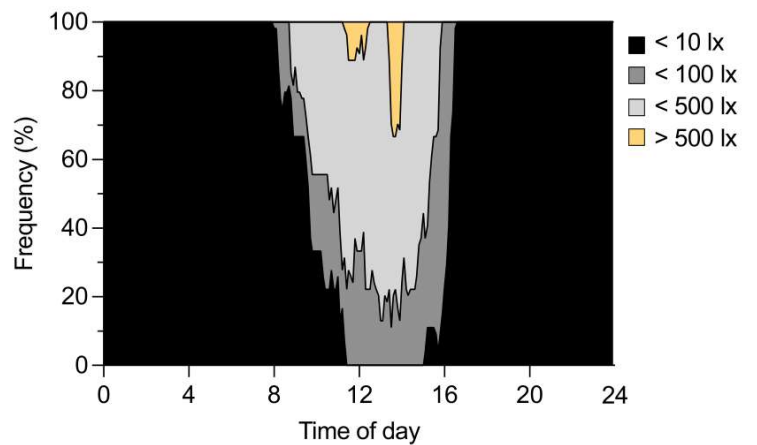

# Participant 3

## Living room

MotionWatch wall measurements

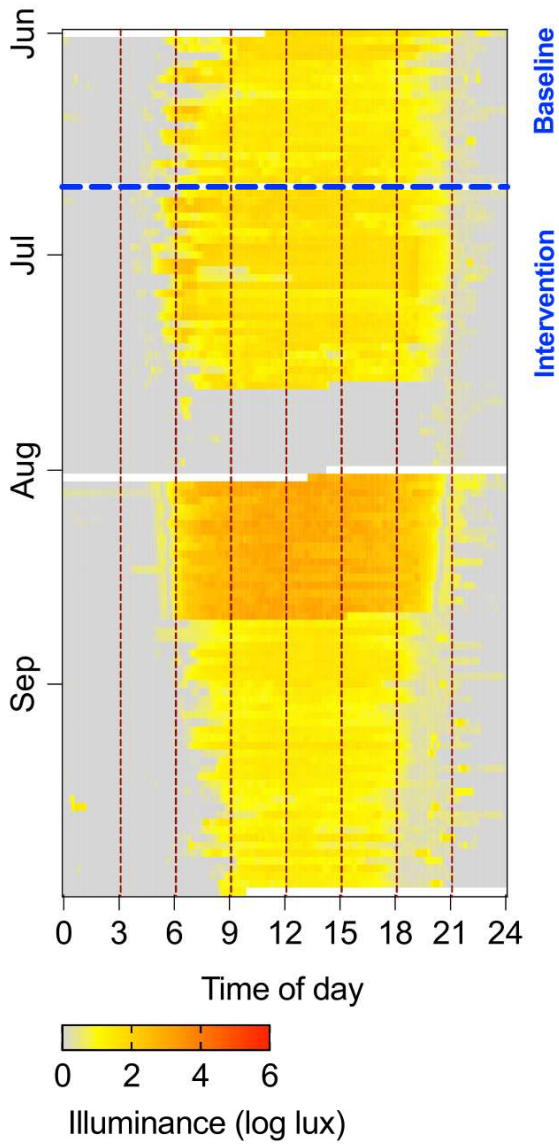

Baseline

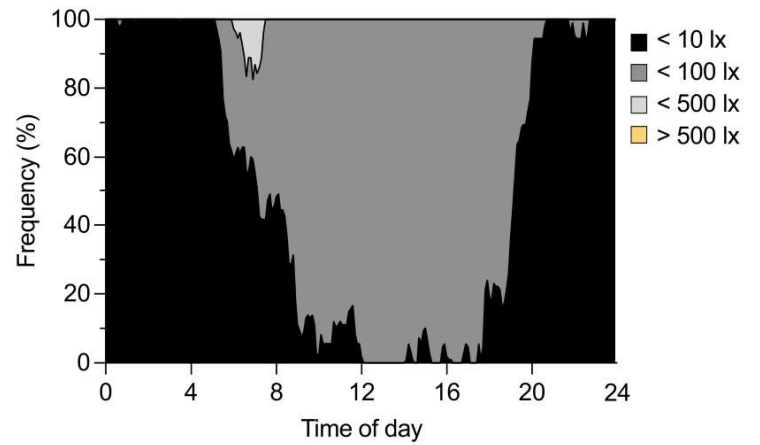

Intervention

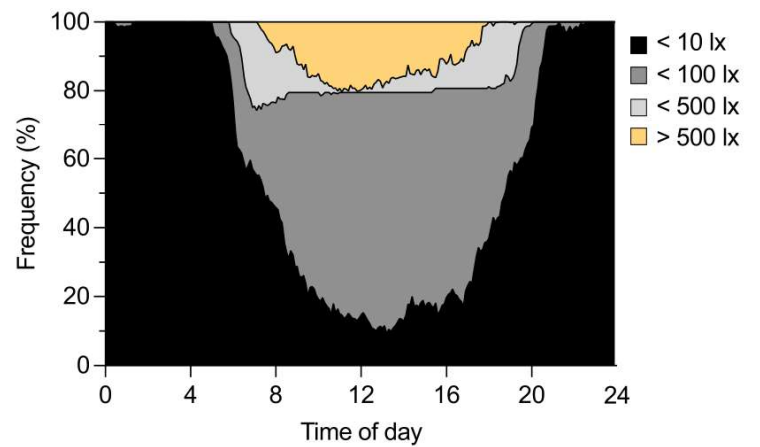

# Participant 4

Withings step counts

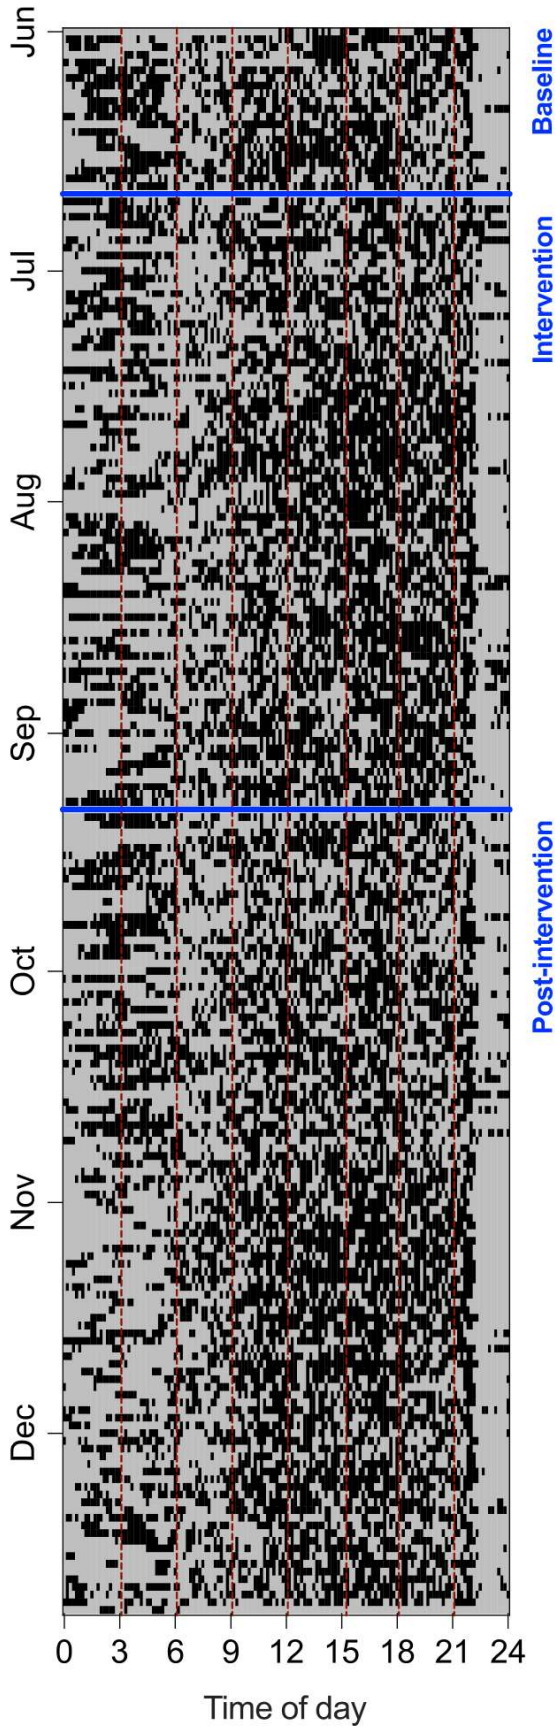

MotionWatch wrist light measurement

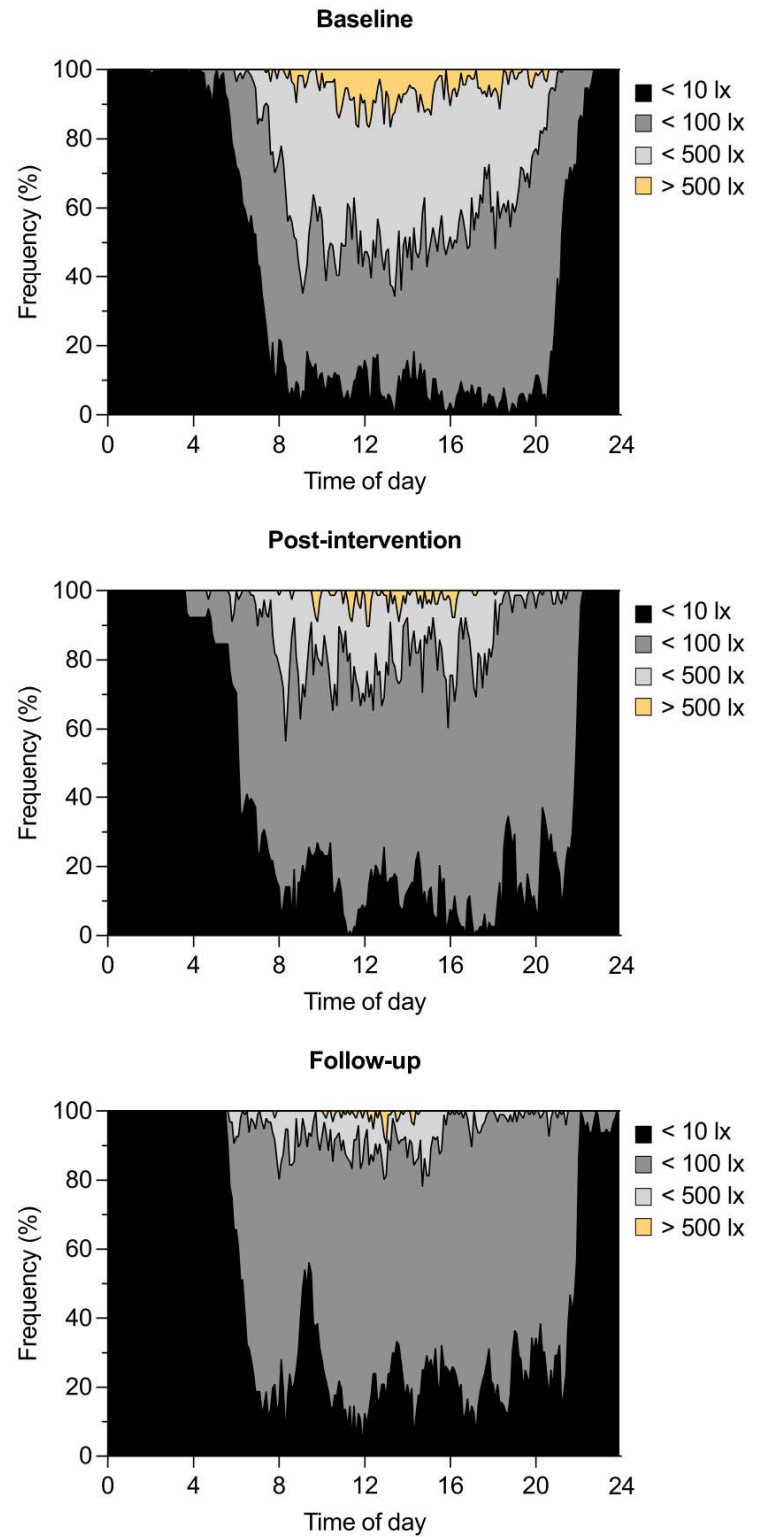

# Participant 4

## Bedroom

### MotionWatch wall measurements

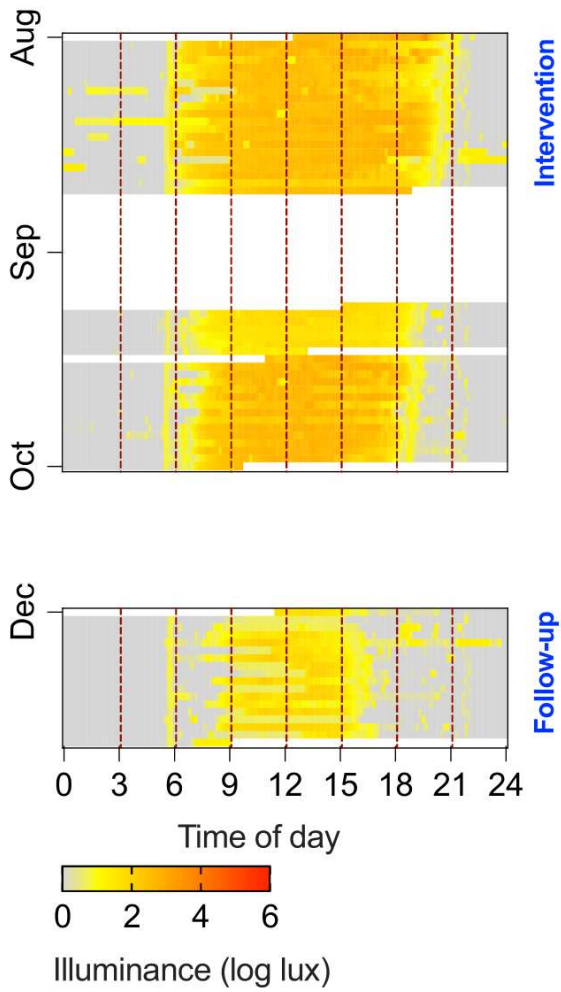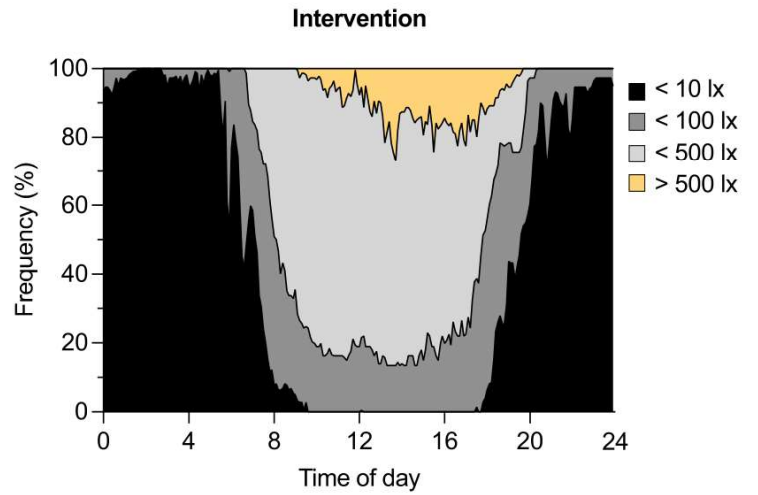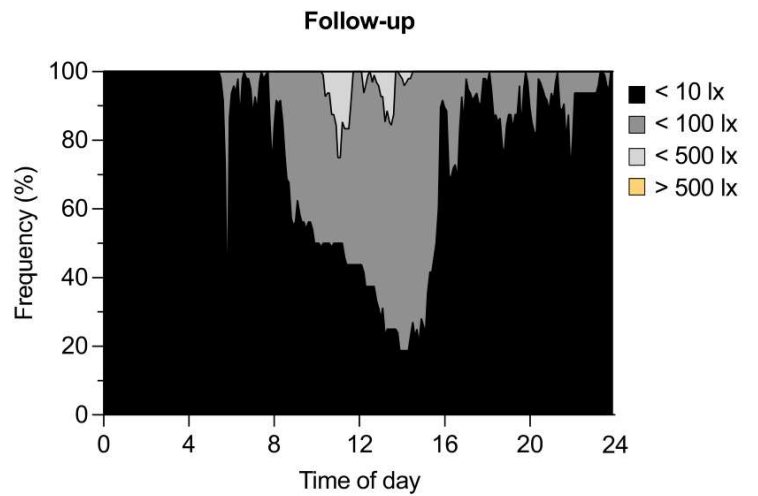

# Participant 4

## Living room

### MotionWatch wall measurements

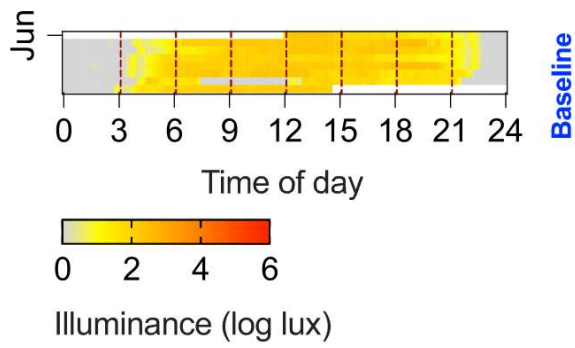

### Baseline

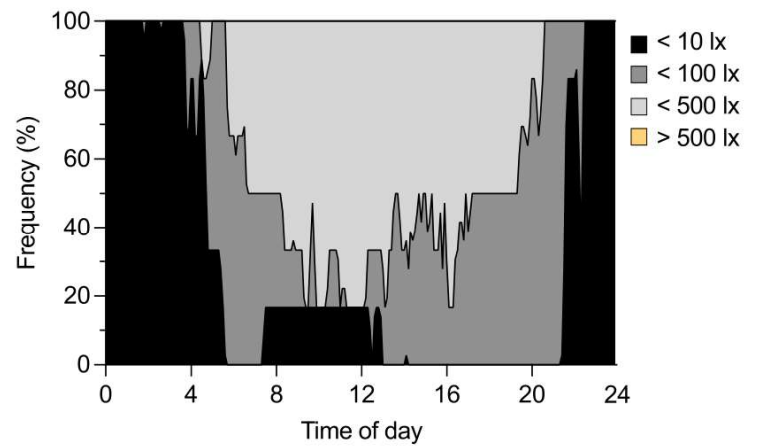

## Participant 5

Withings step counts

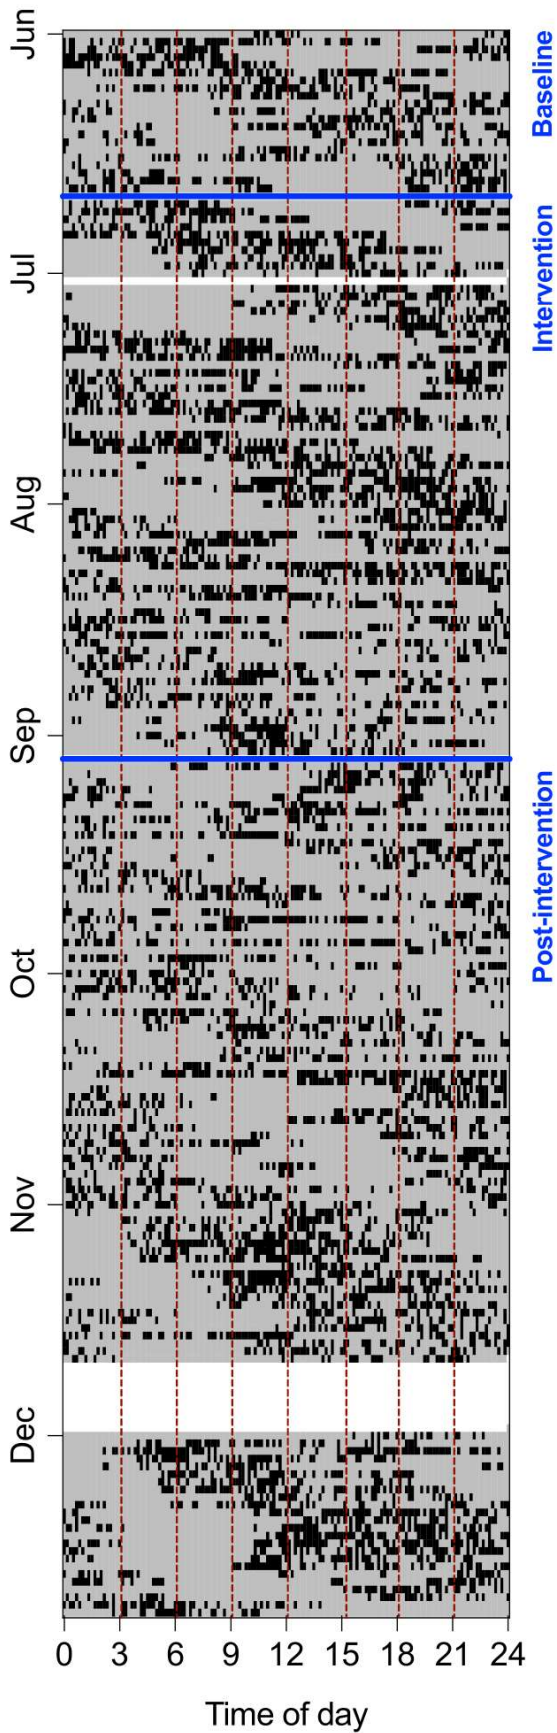

MotionWatch wrist light measurement

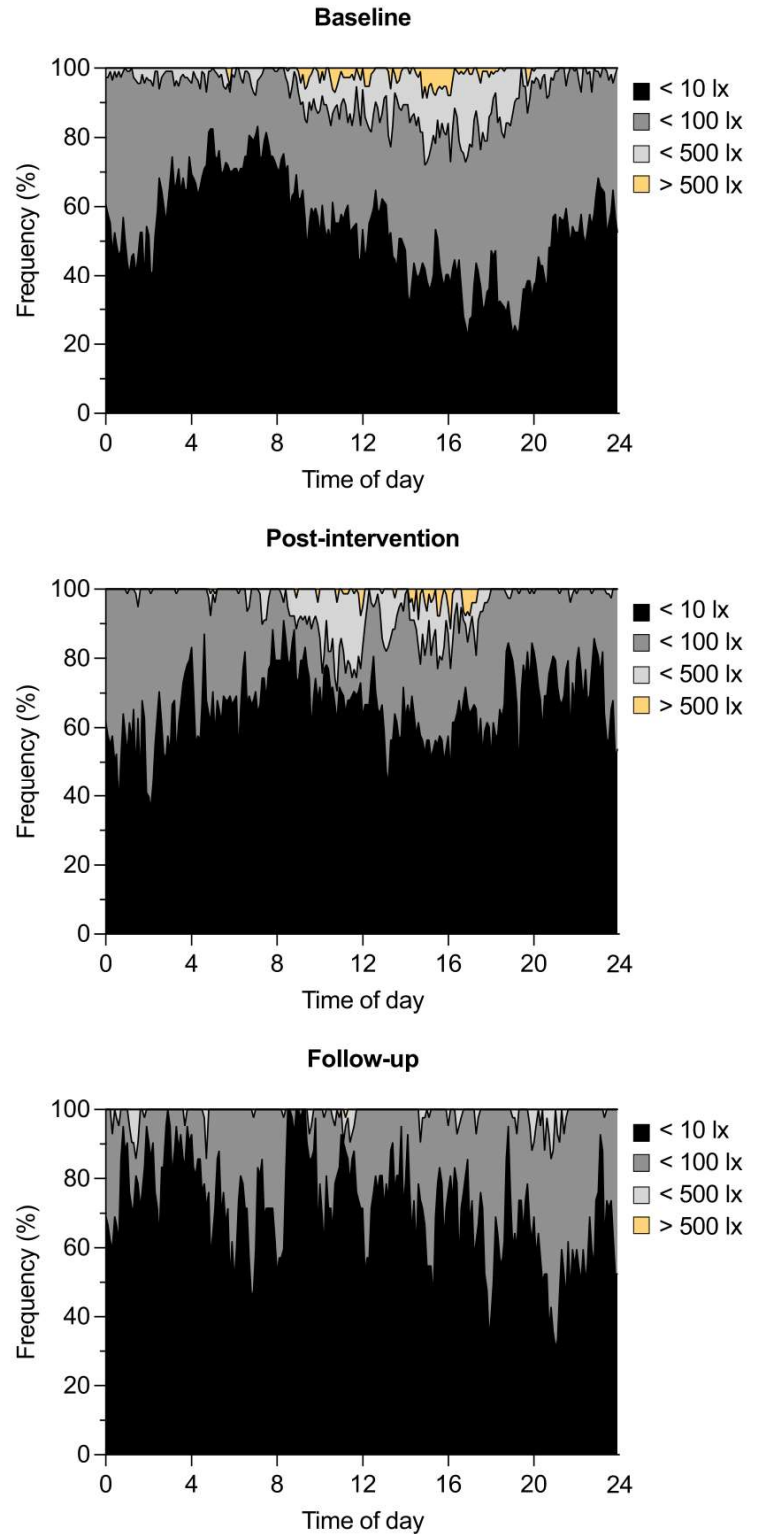

# Participant 5

## Bedroom

### MotionWatch wall measurements

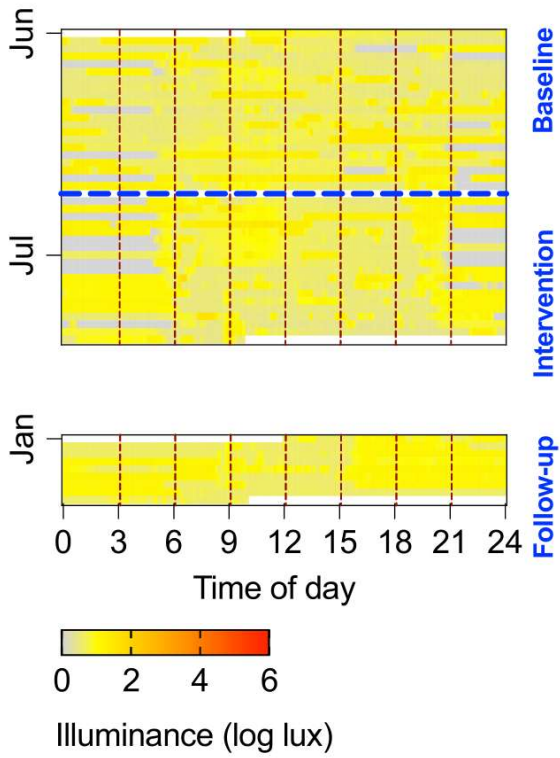

### Baseline

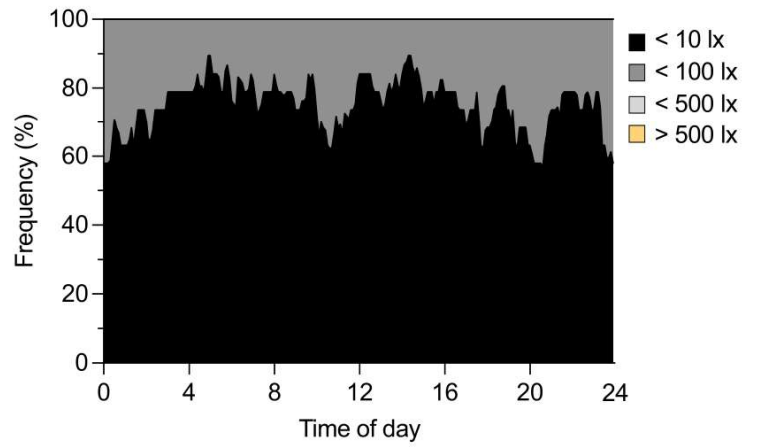

### Intervention

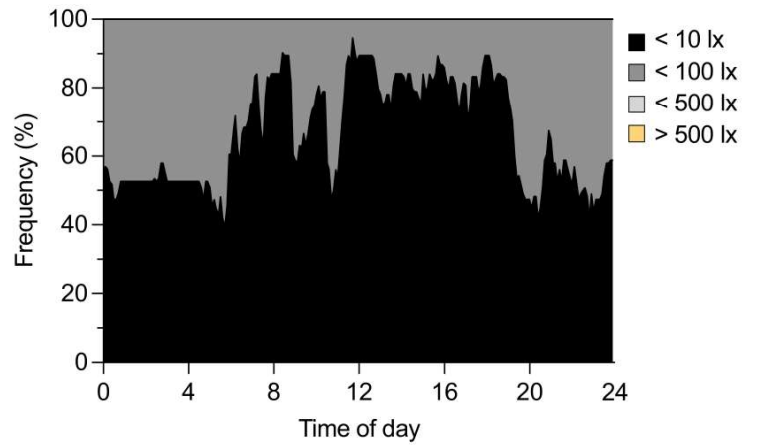

### Follow-up

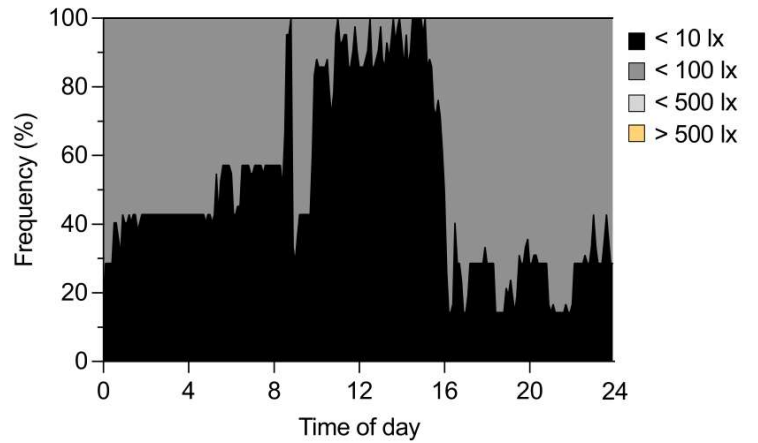

# Participant 5

## Living room

### MotionWatch wall measurements

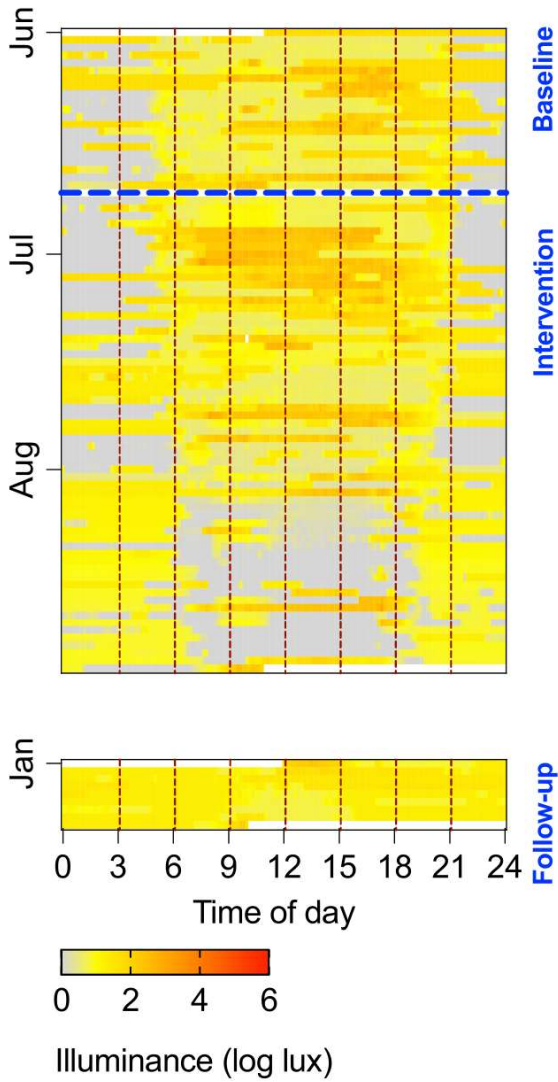

### Baseline

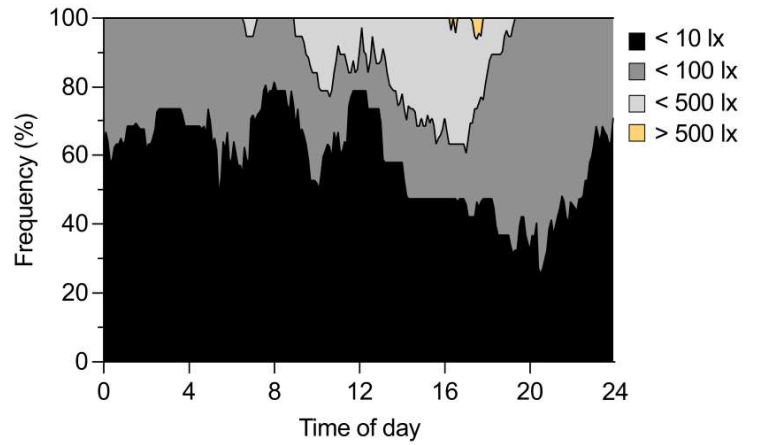

### Intervention

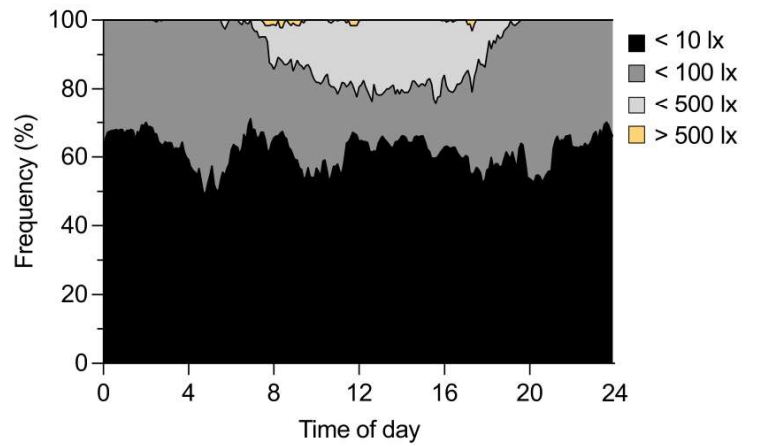

### Follow-up

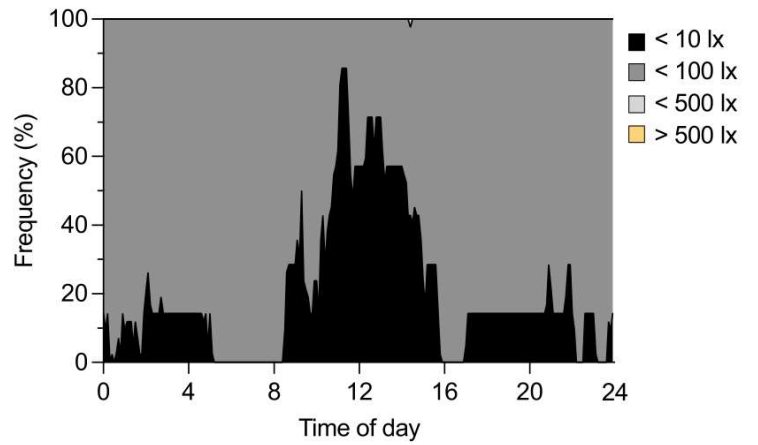

## Participant 6

Withings step counts

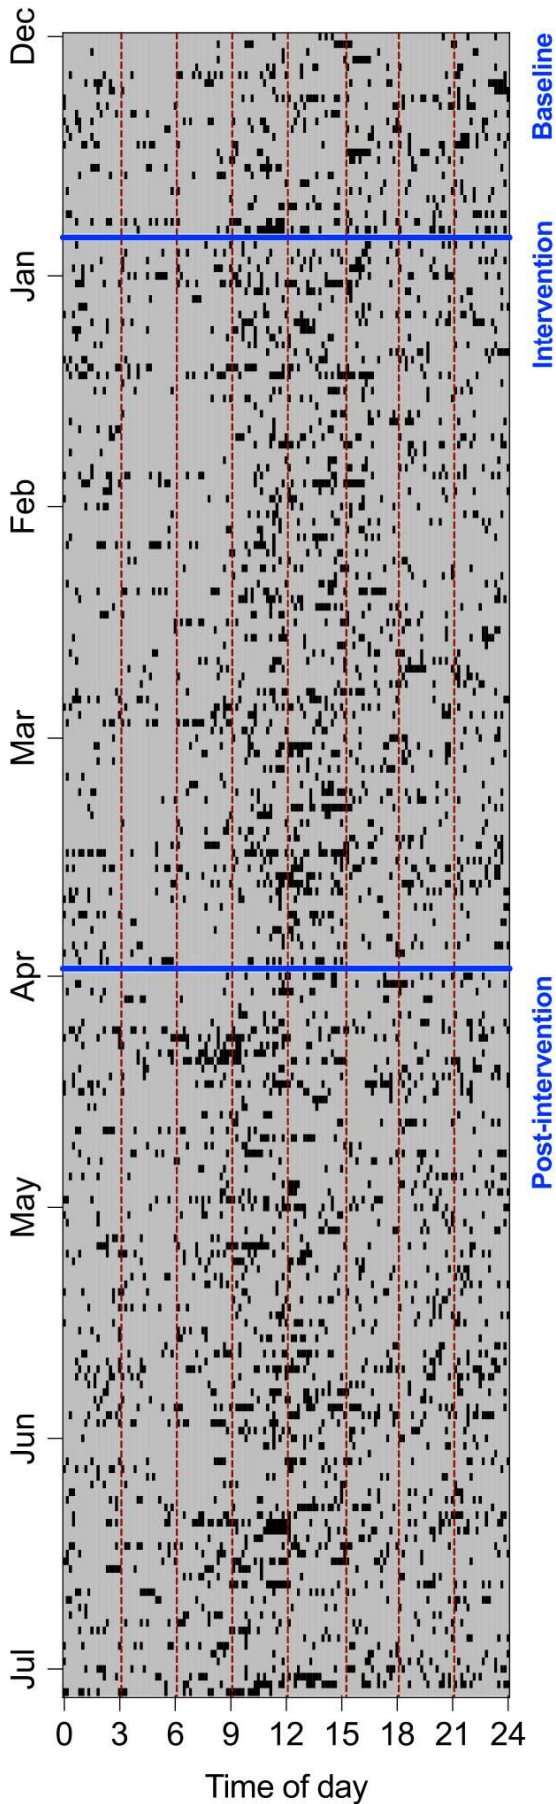

MotionWatch wrist light measurement

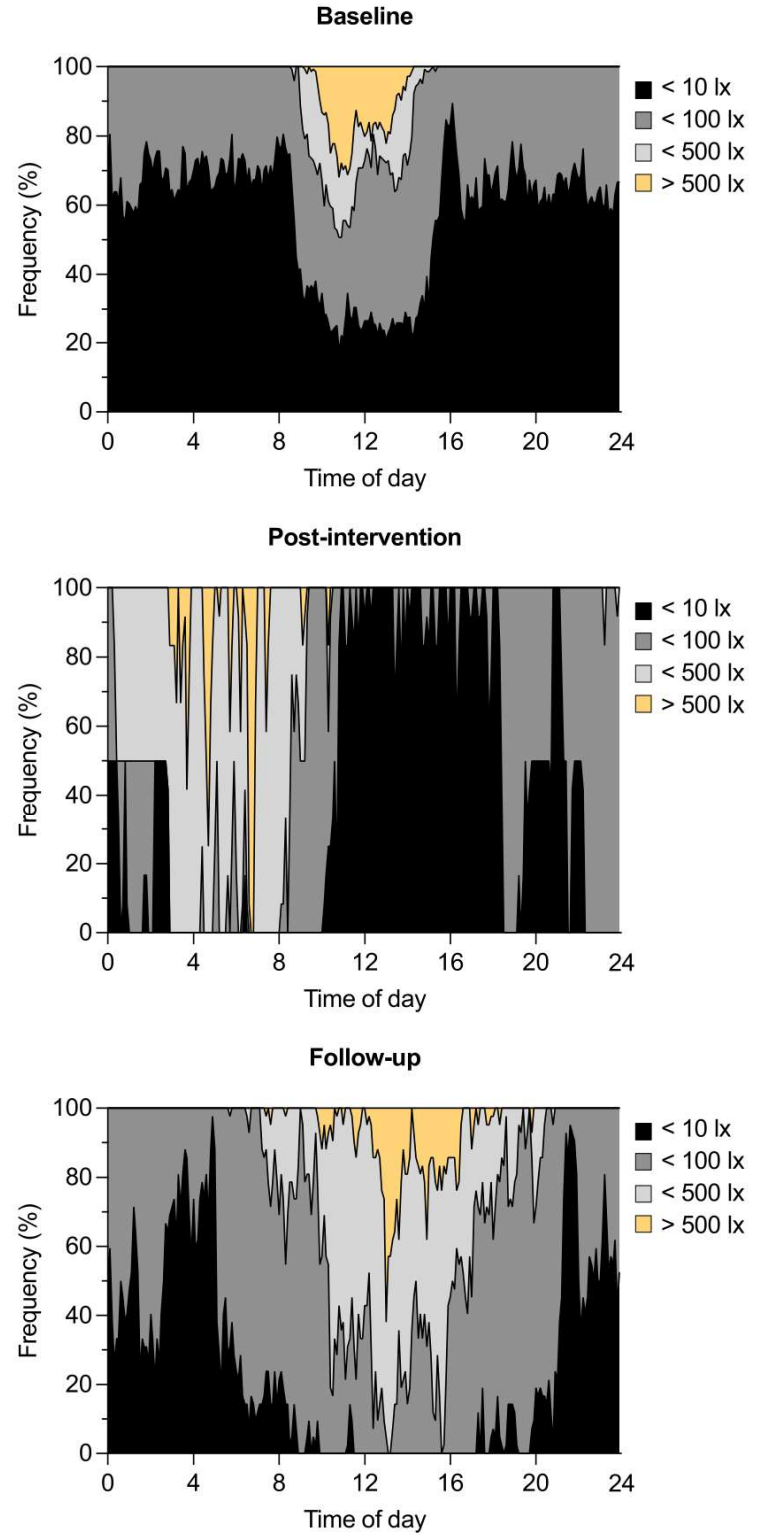

# Participant 6

## Bedroom

### MotionWatch wall measurements

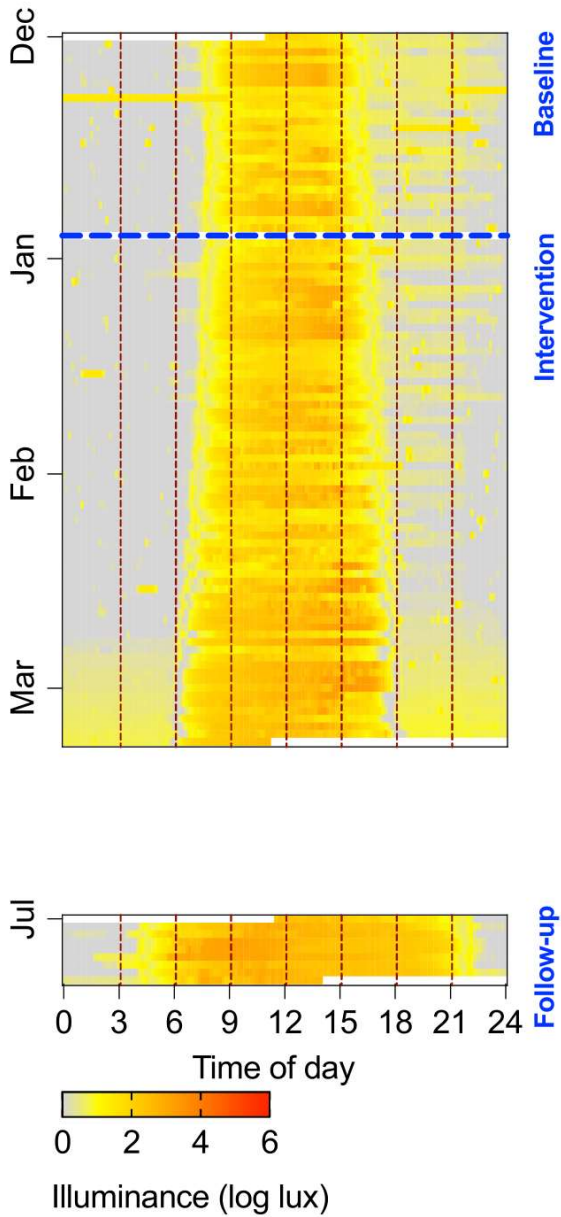

### Baseline

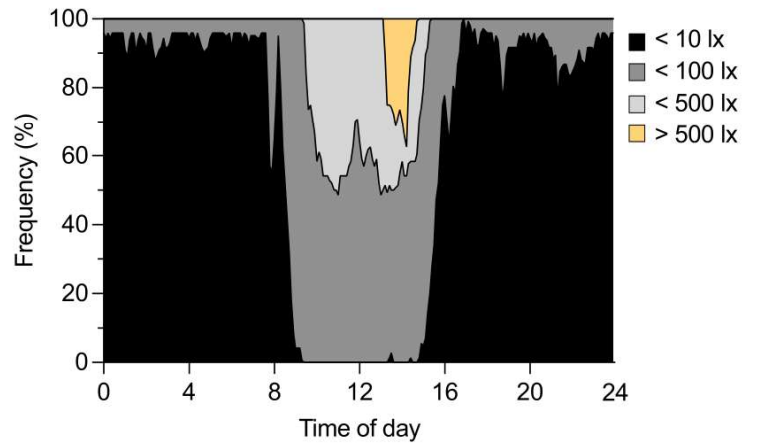

### Intervention

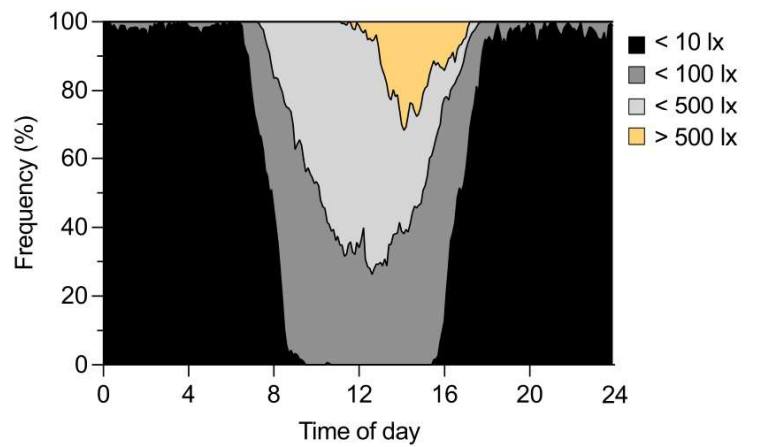

### Follow-up

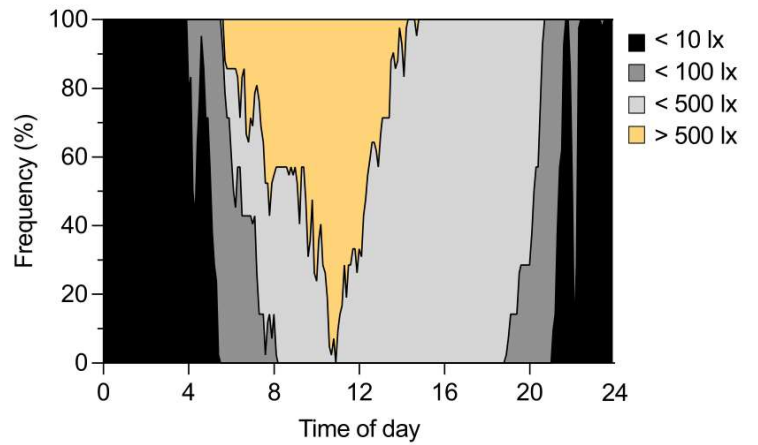

# Participant 6

## Living room

### MotionWatch wall measurements

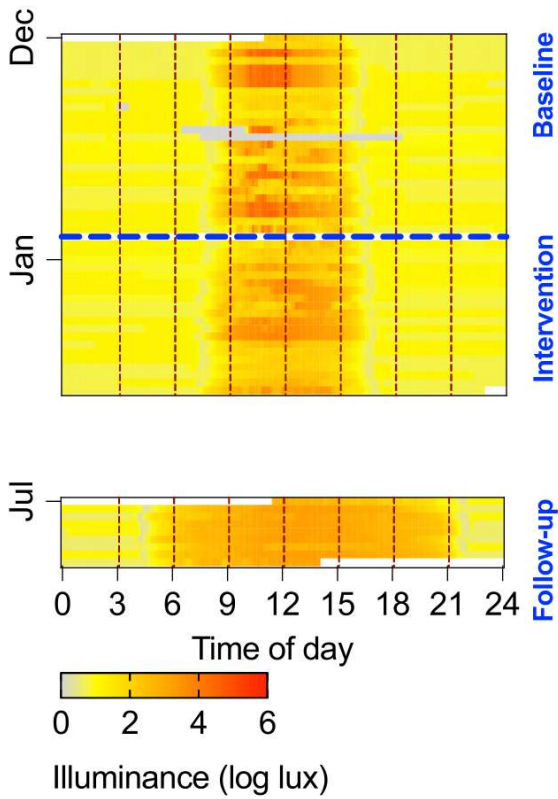

### Baseline

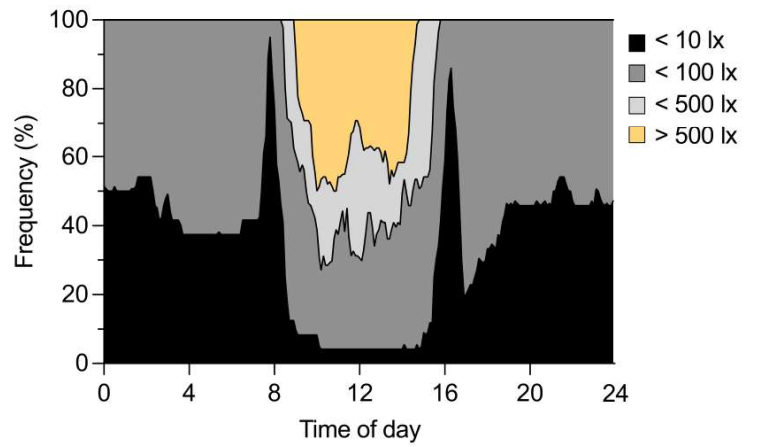

### Intervention

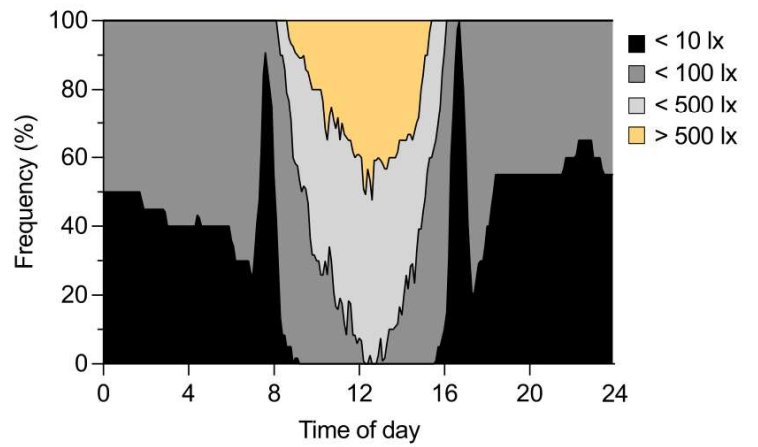

### Follow-up

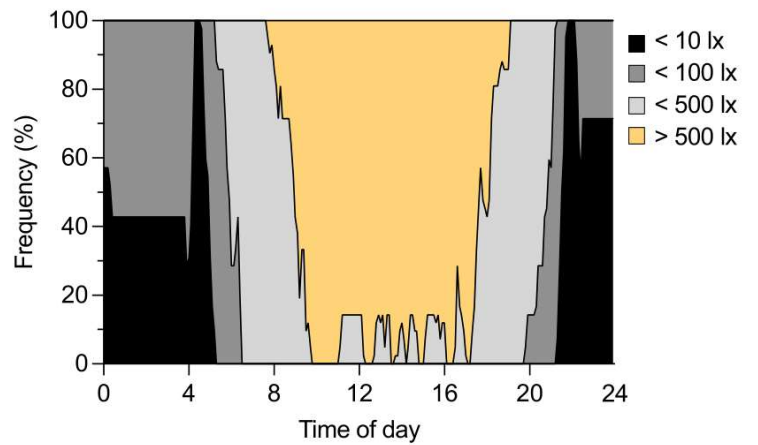

# Participant 7

Withings step counts

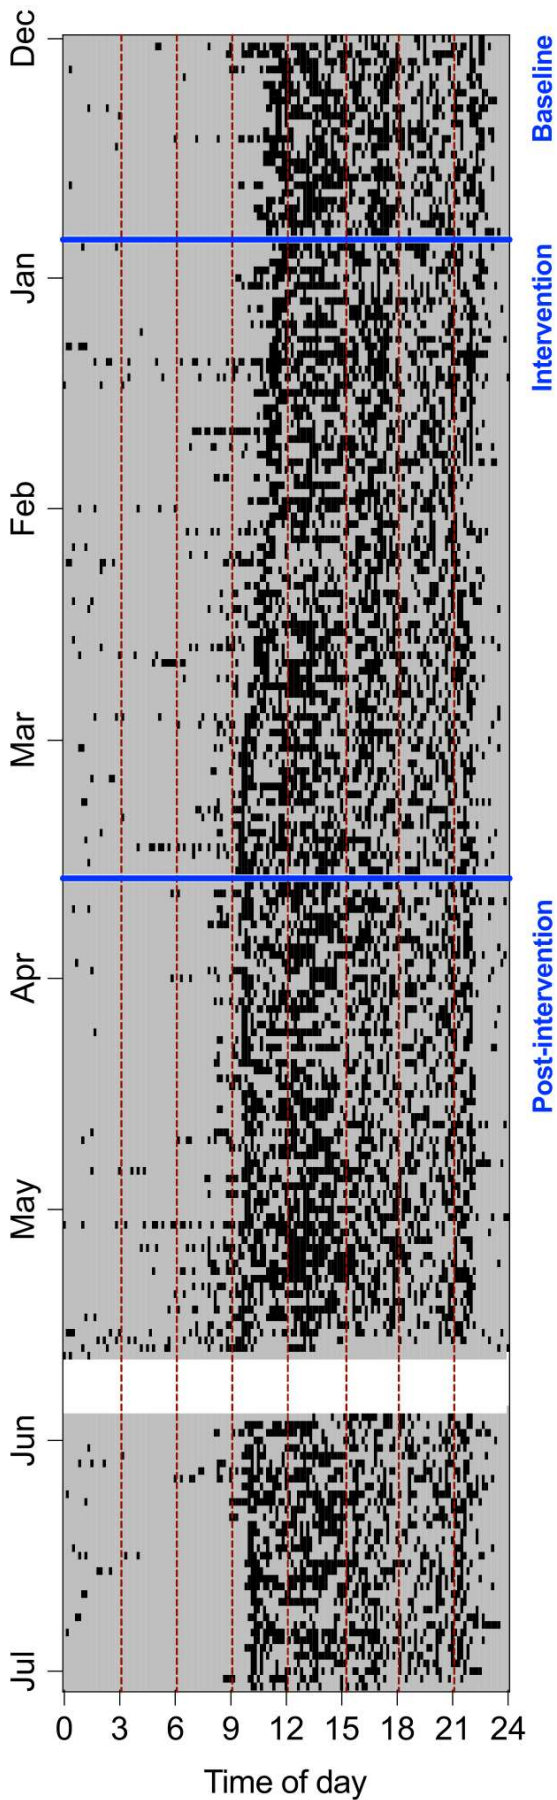

MotionWatch wrist light measurement

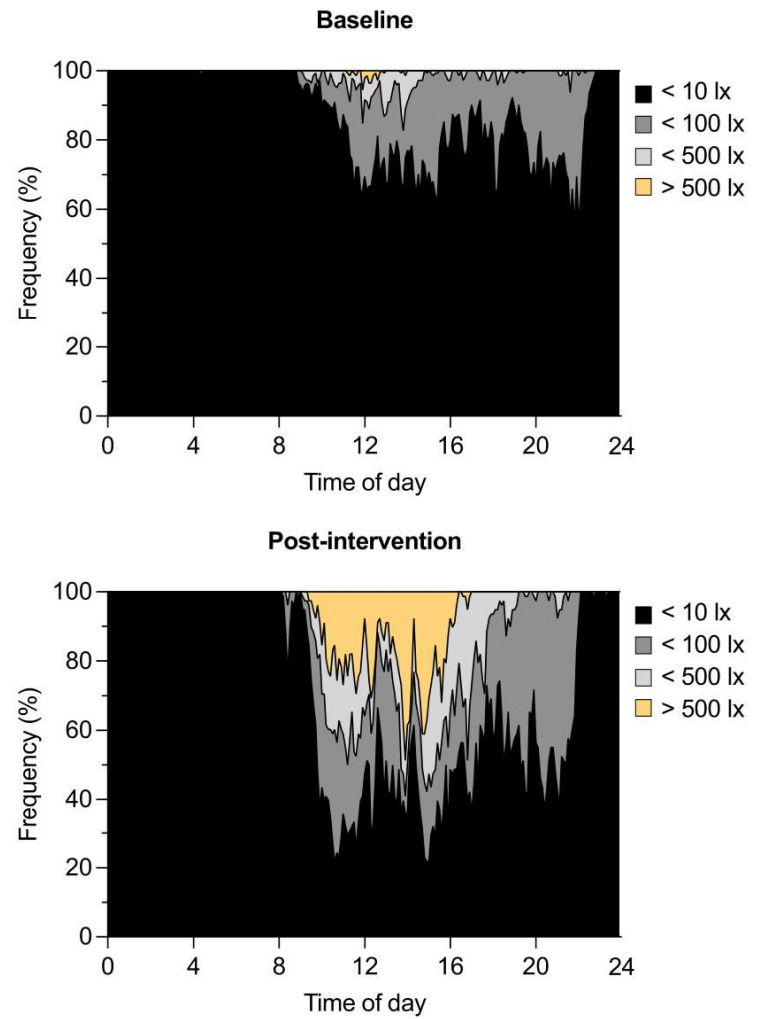

# Participant 7

## Bedroom

### MotionWatch wall measurements

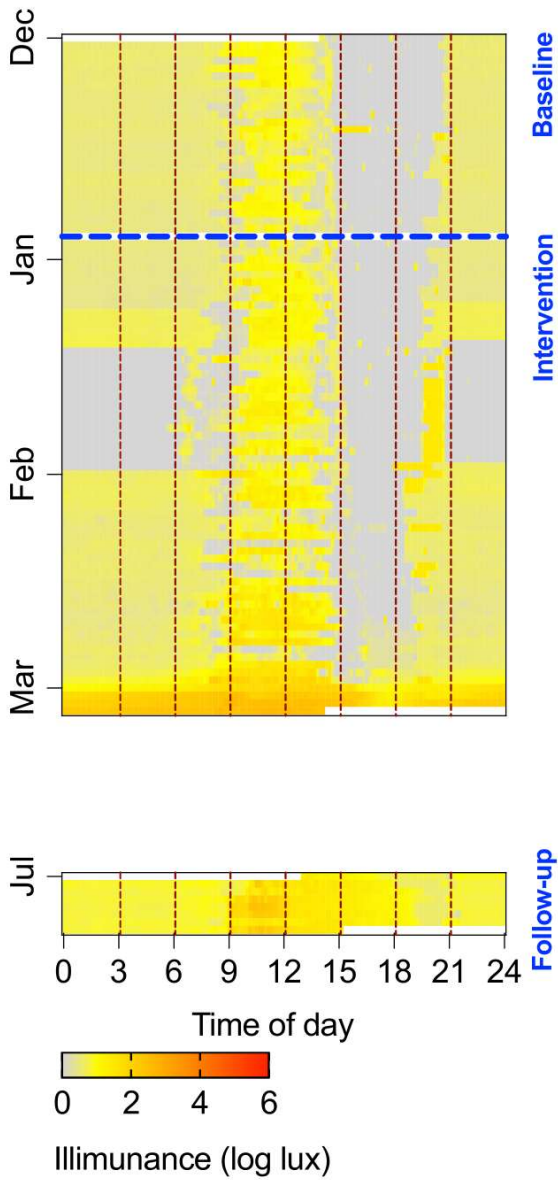

### Baseline

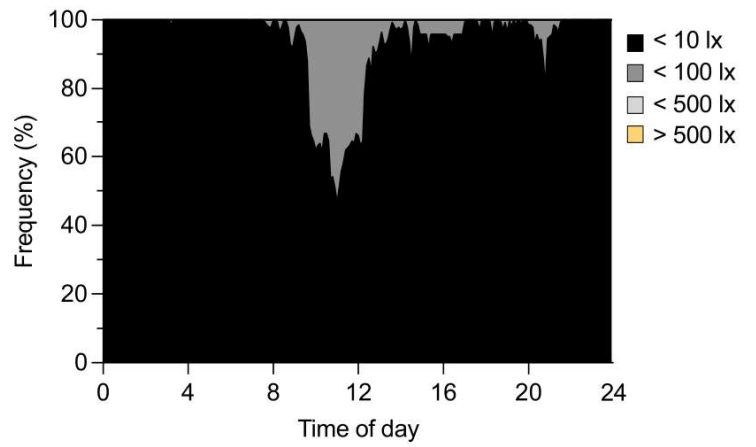

### Intervention

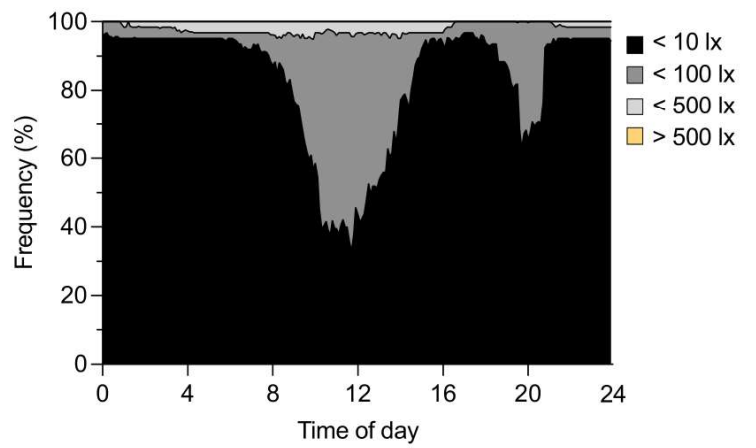

### Follow-up

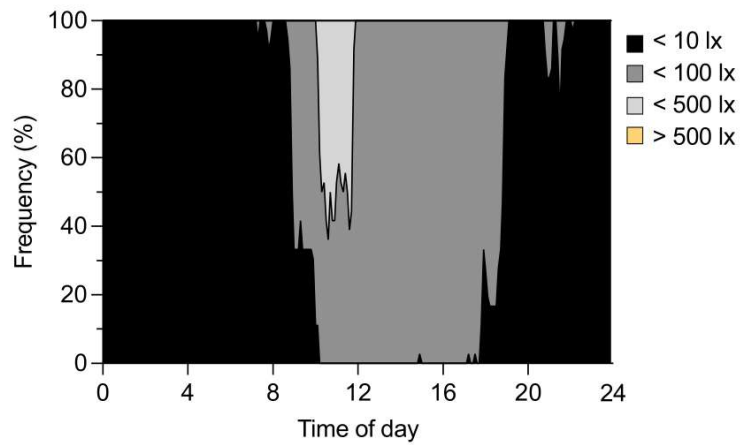

# Participant 7

## Living room

### MotionWatch wall measurements

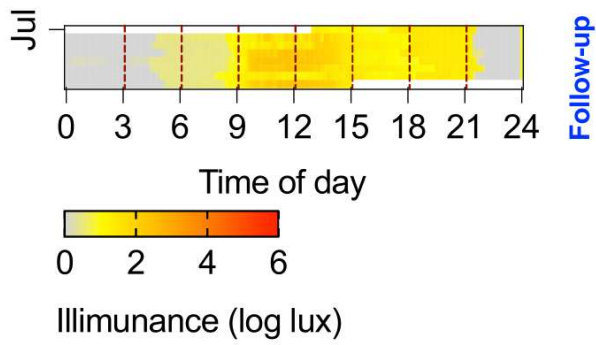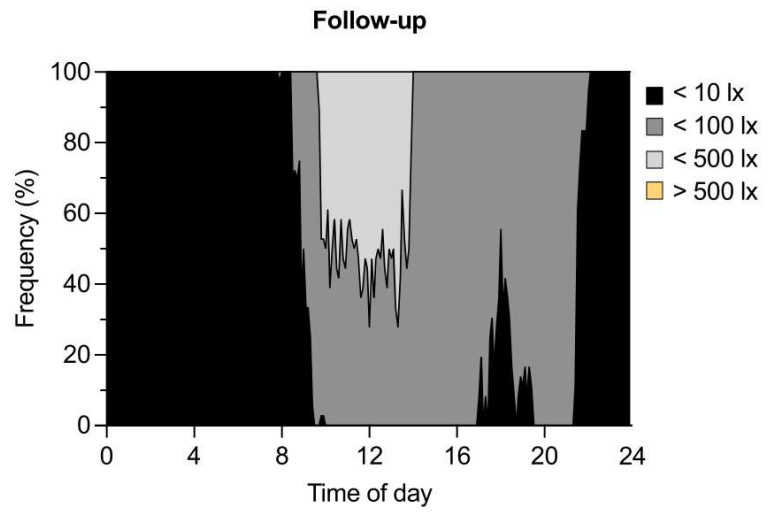

# Participant 8

Withings step counts

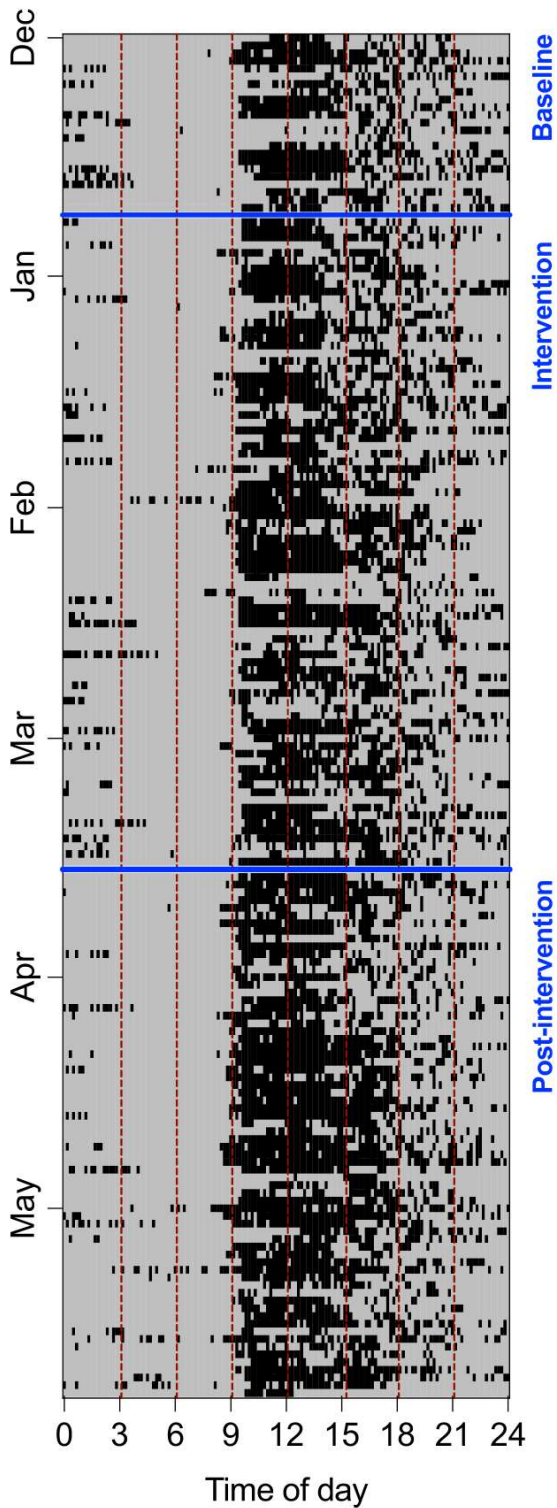

MotionWatch wrist light measurement

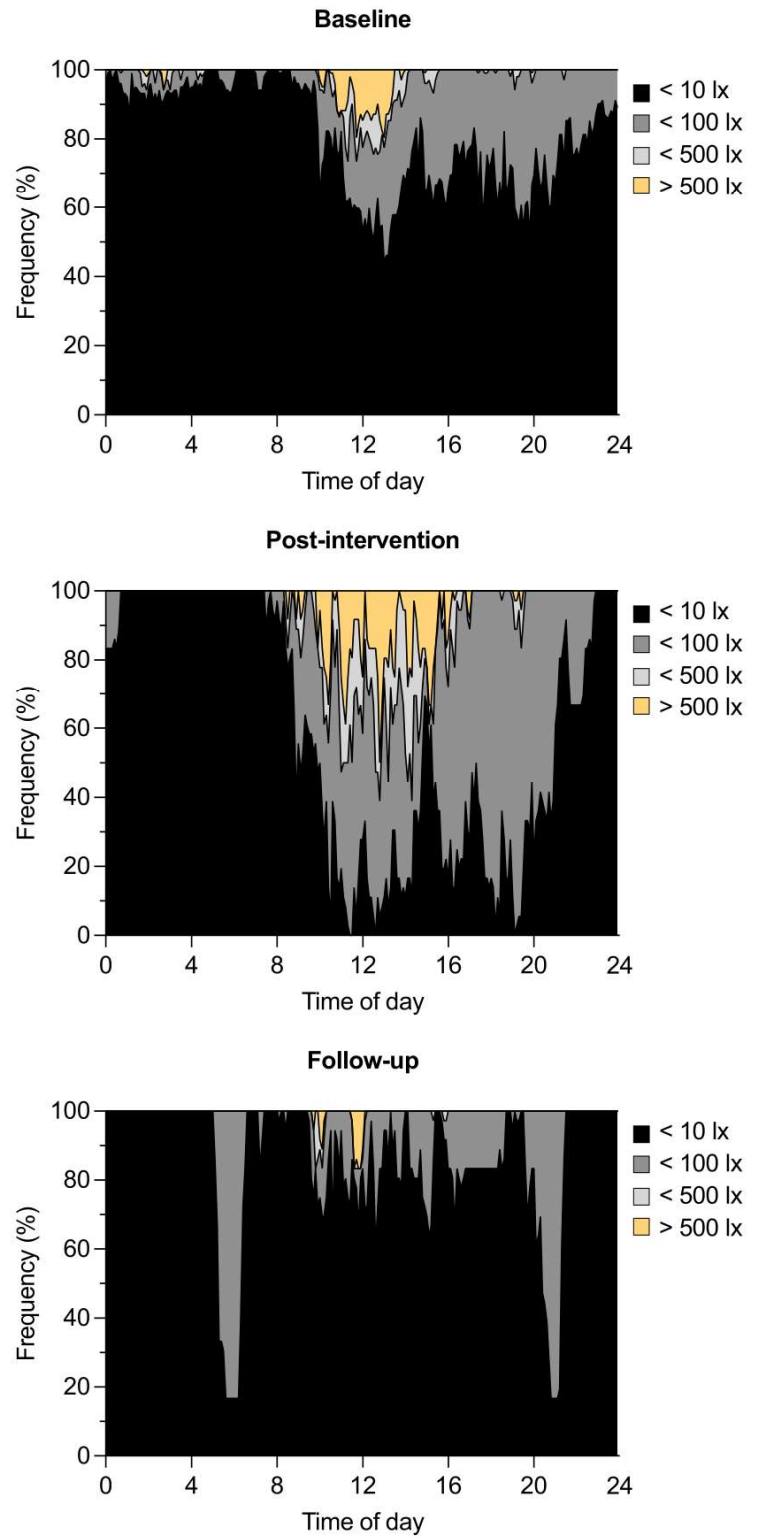

# Participant 8

## Bedroom

### MotionWatch wall measurements

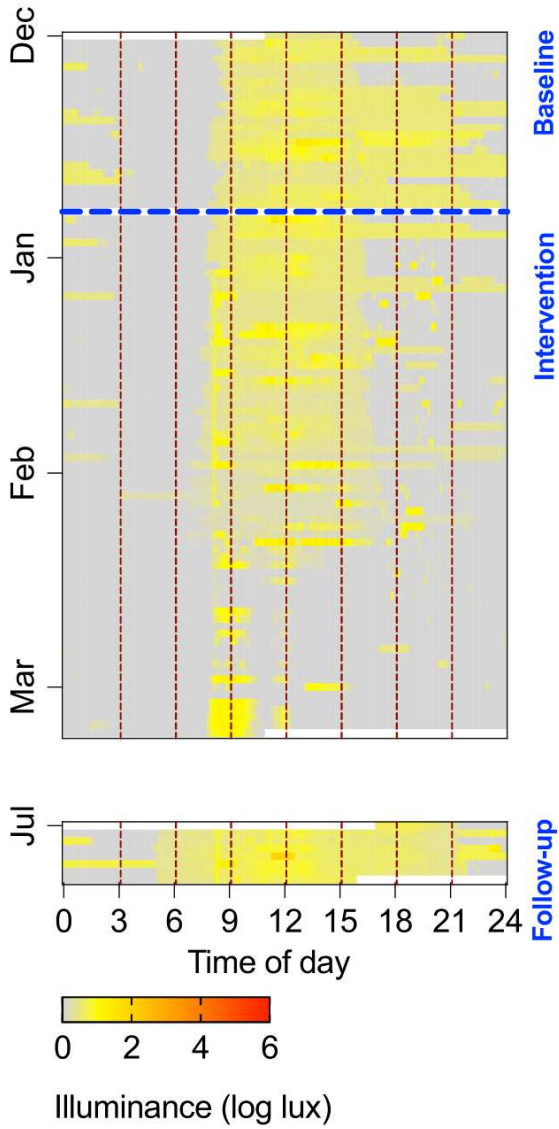

### Baseline

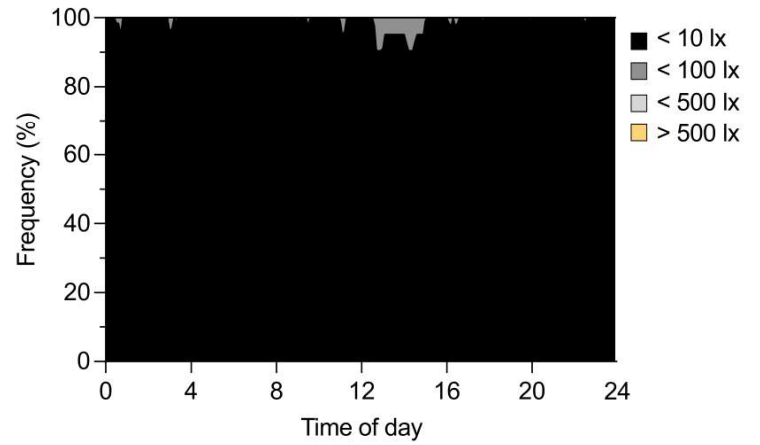

### Intervention

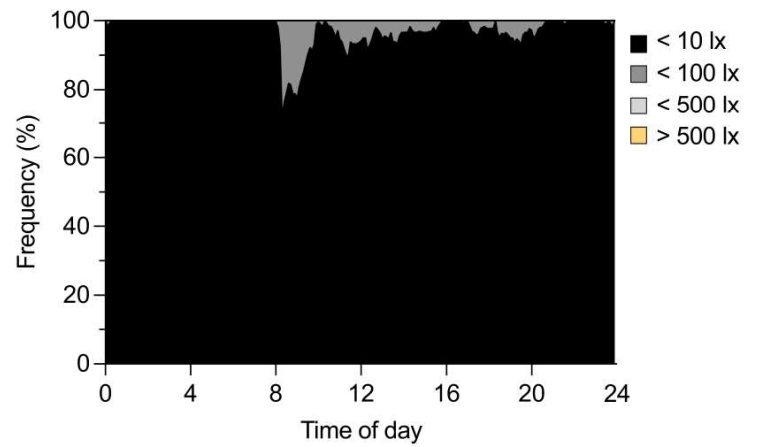

### Follow-up

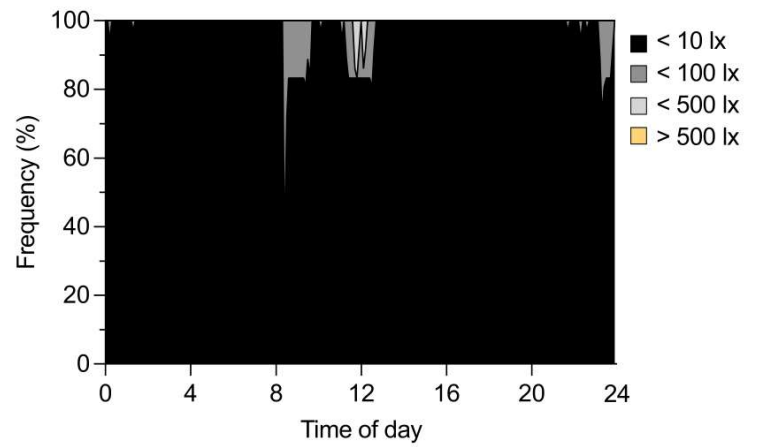

# Participant 8

## Living room

### MotionWatch wall measurements

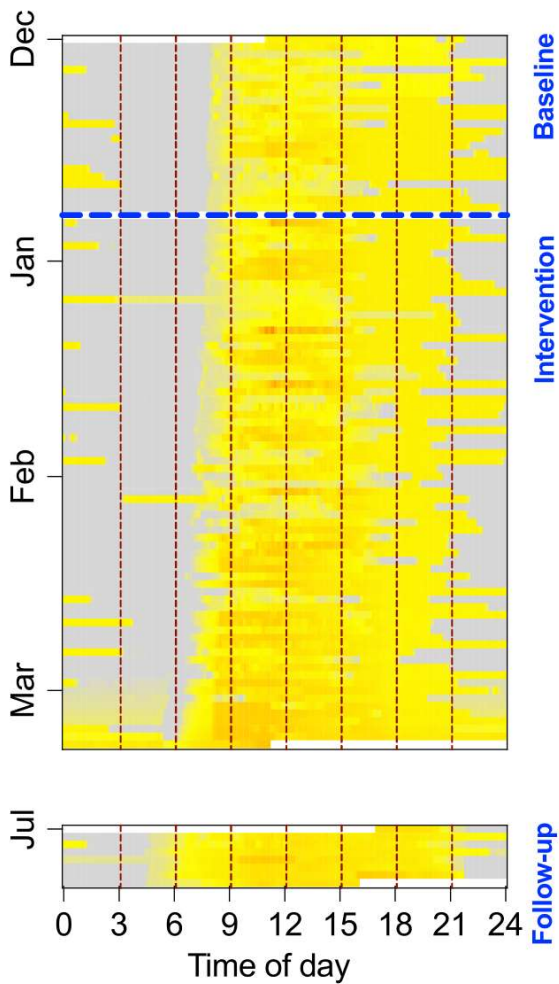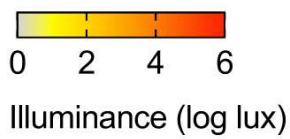

### Baseline

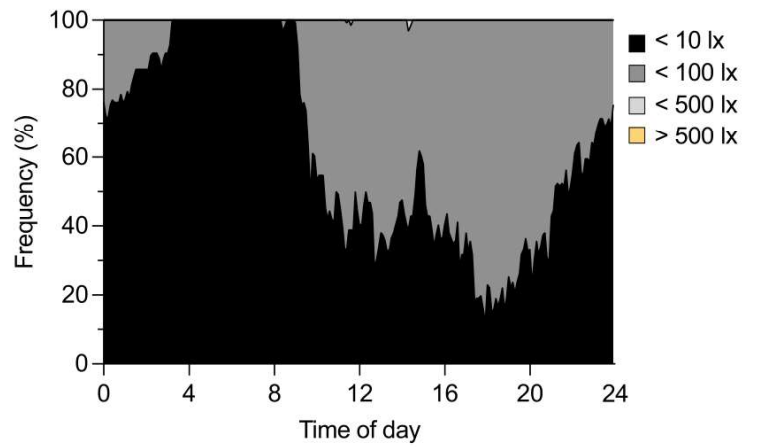

### Intervention

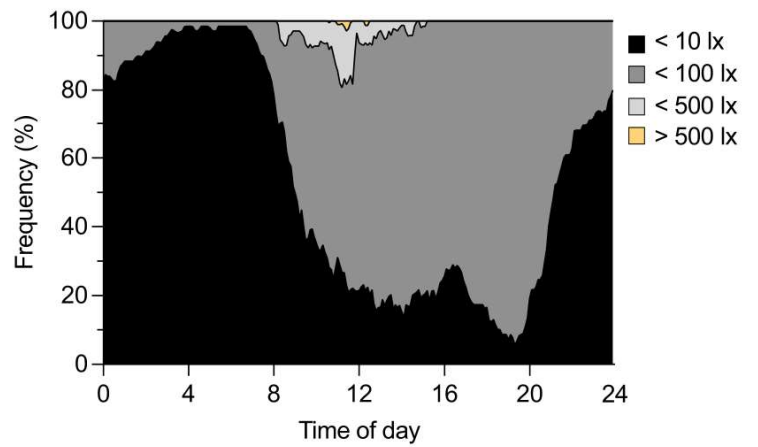

### Follow-up

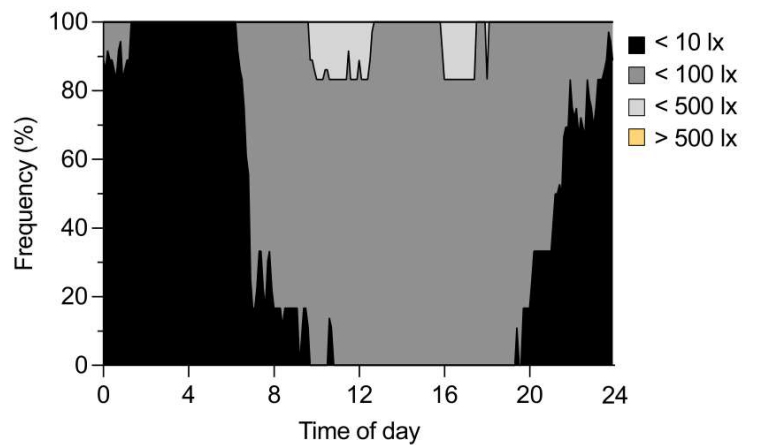

# Participant 9

Withings step counts

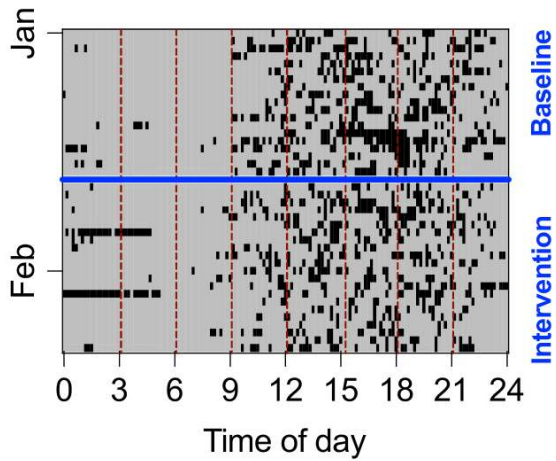

MotionWatch wrist light measurement

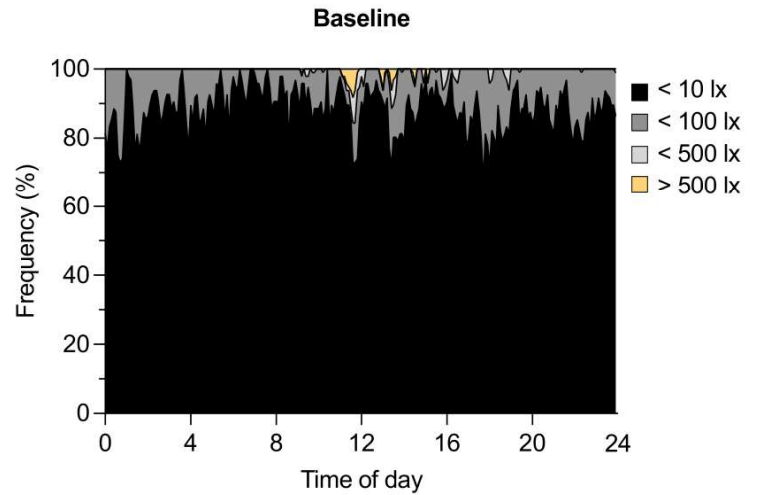

MotionWatch activity

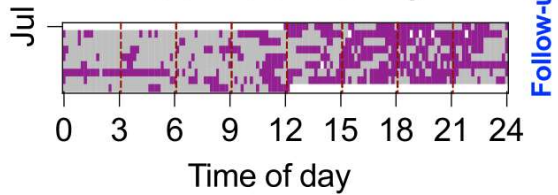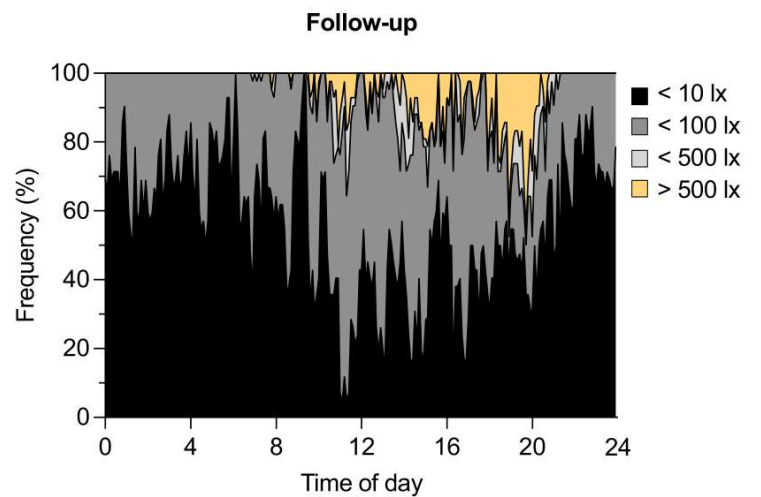

# Participant 9

## Bedroom

### MotionWatch wall measurements

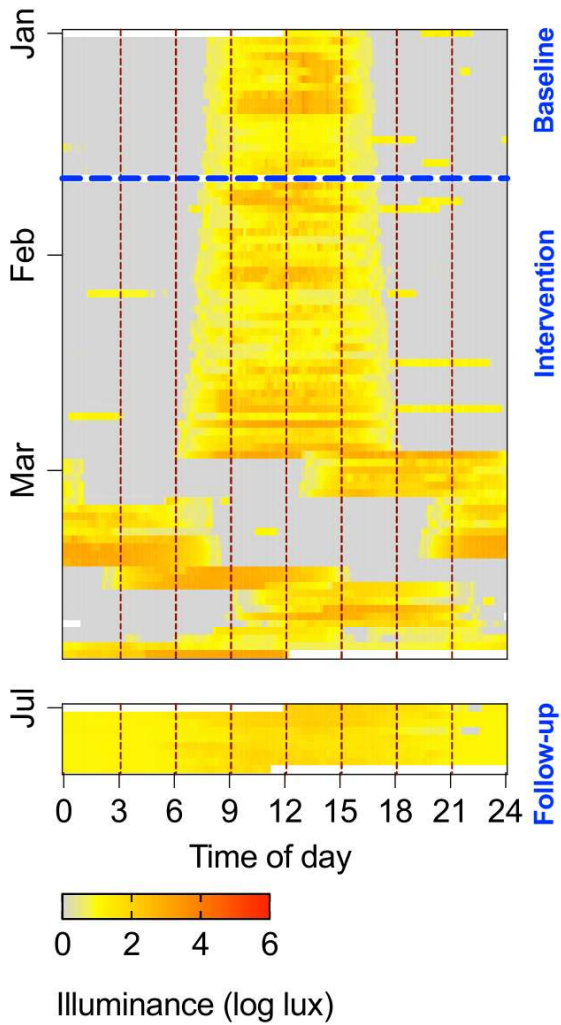

### Baseline

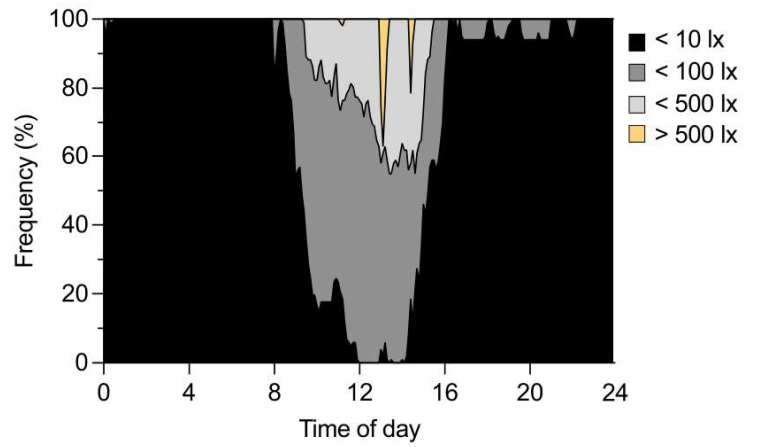

### Intervention

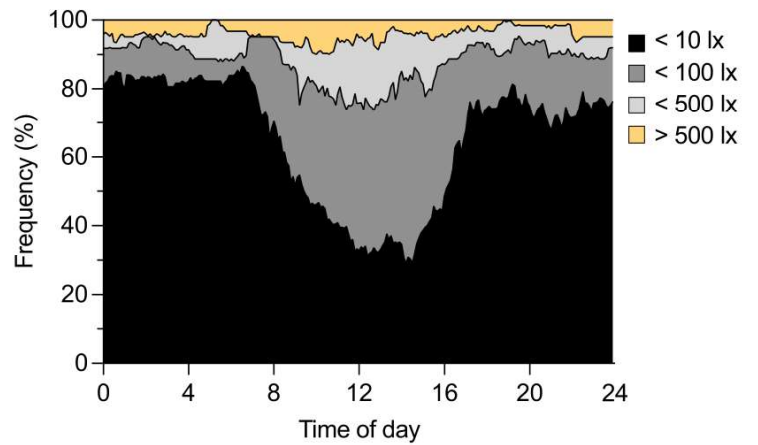

### Follow-up

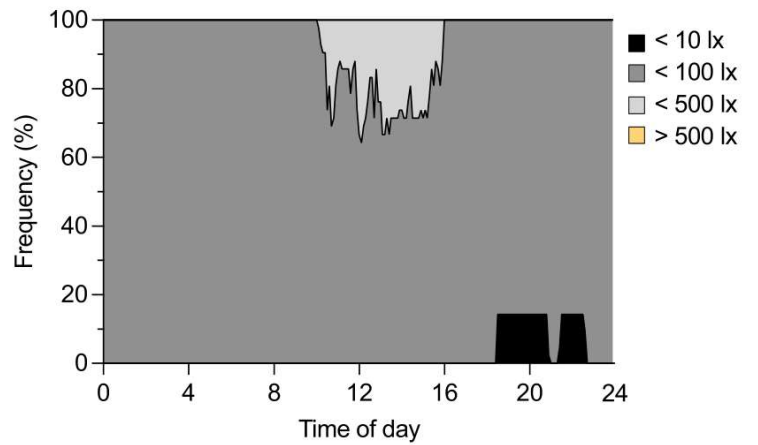

# Participant 9

## Living room

### MotionWatch wall measurements

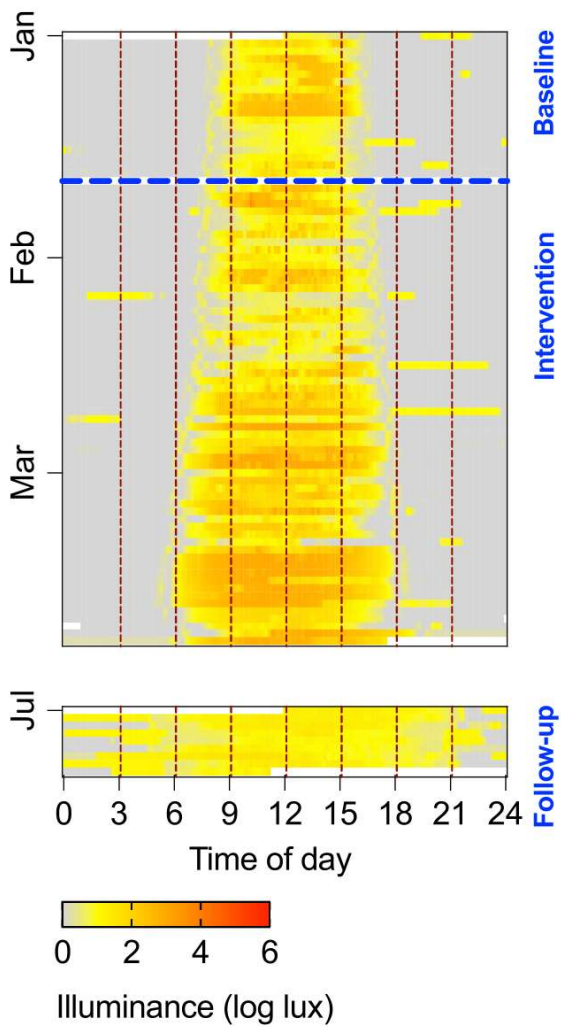

### Baseline

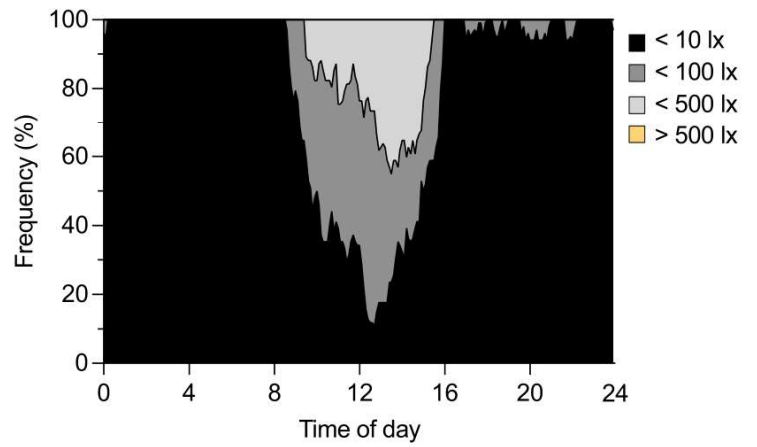

### Intervention

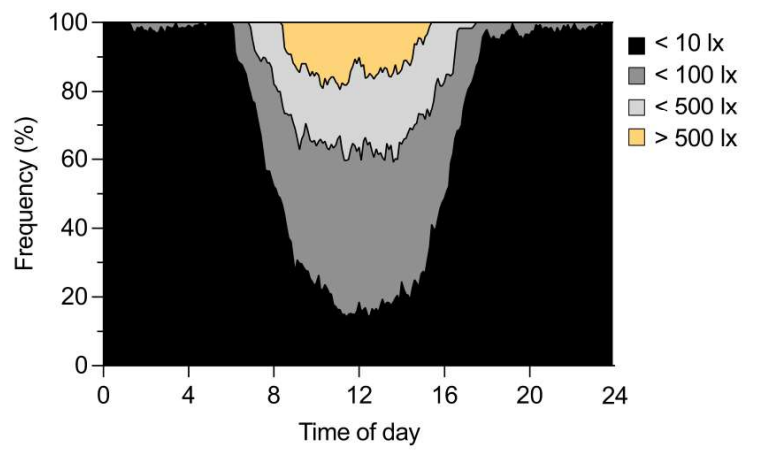

### Follow-up

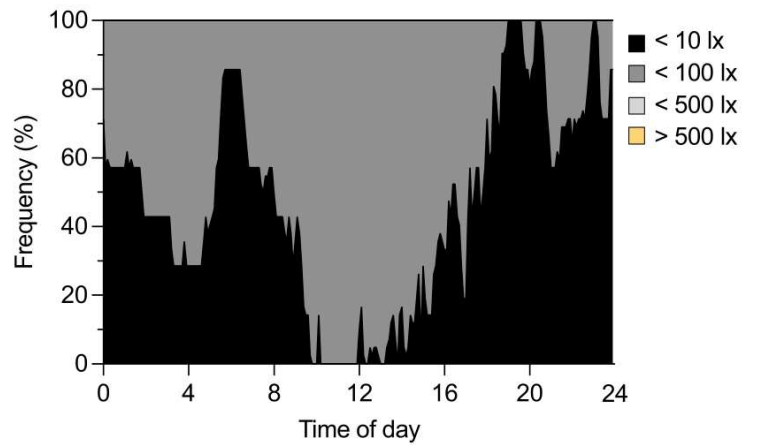

# Participant 10

Withings step counts

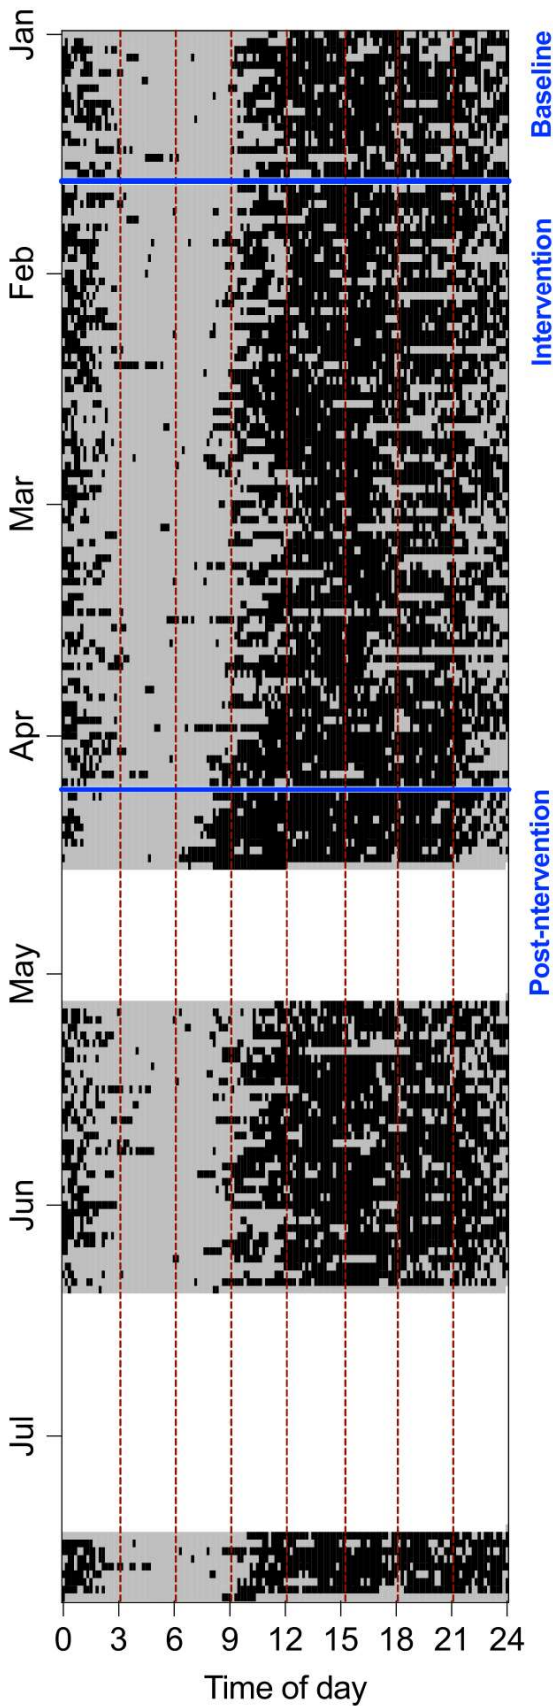

MotionWatch wrist light measurement

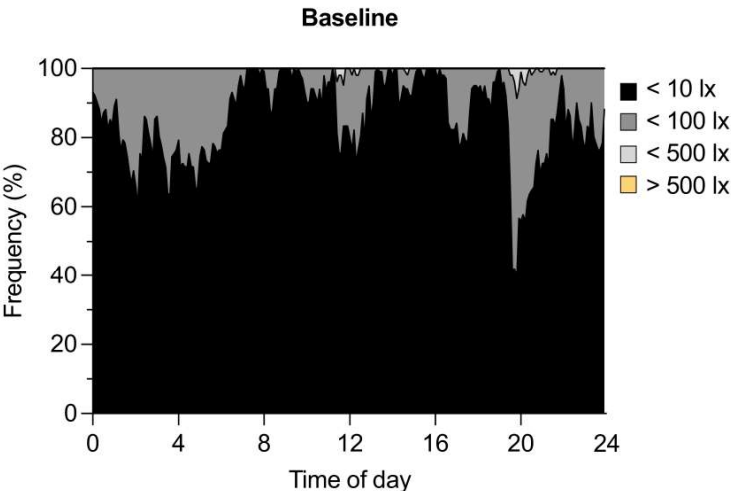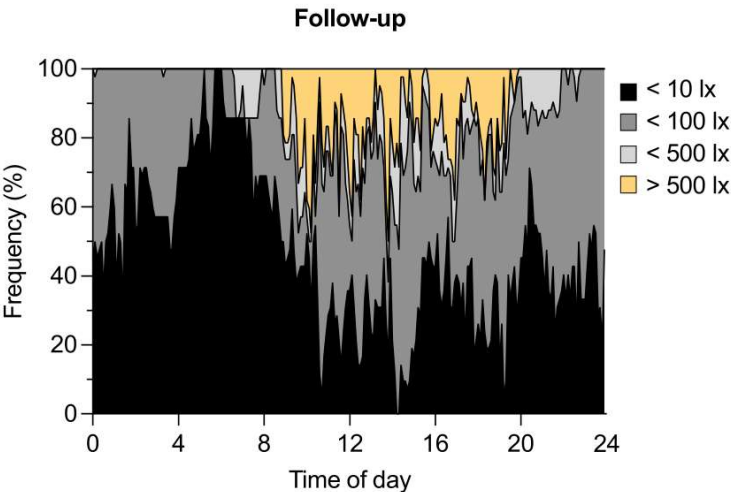

# Participant 10

## Bedroom

### MotionWatch wall measurements

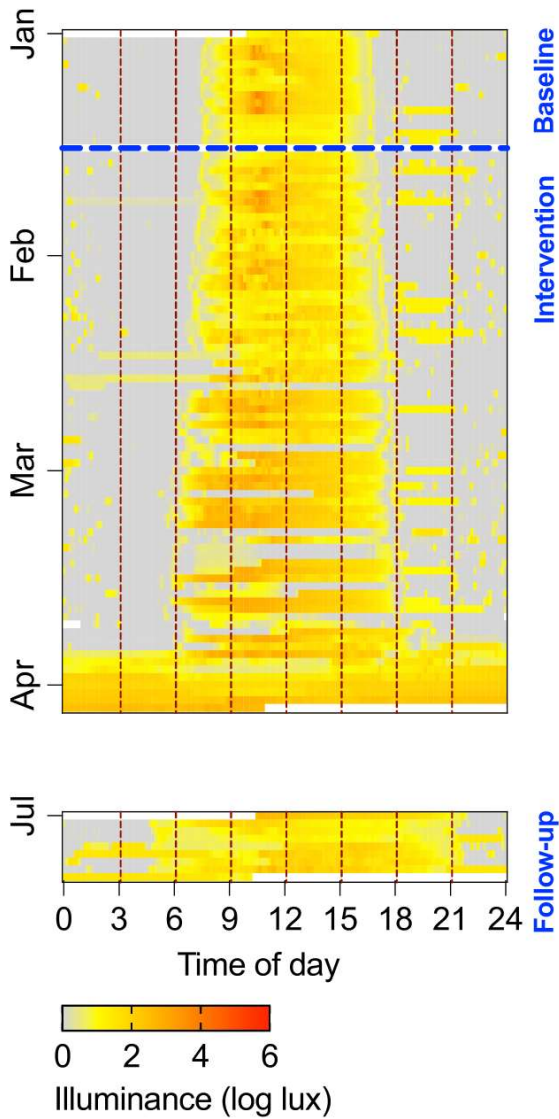

### Baseline

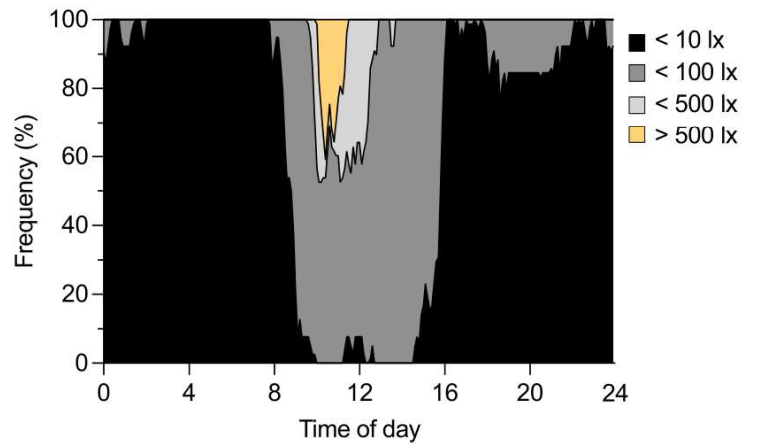

### Intervention

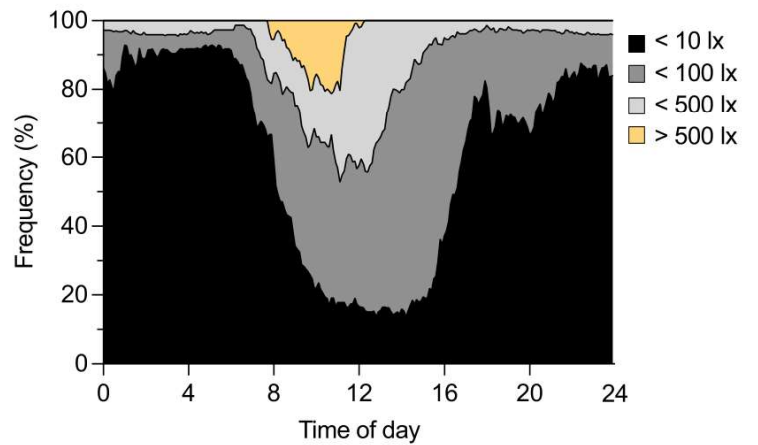

### Follow-up

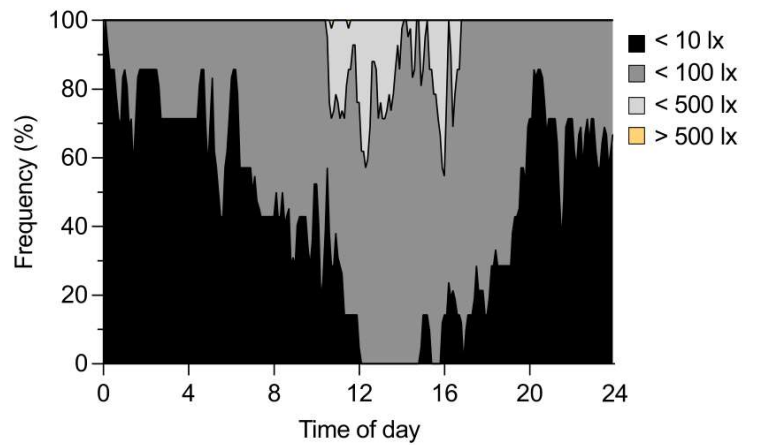

# Participant 10

## Living room

### MotionWatch wall measurements

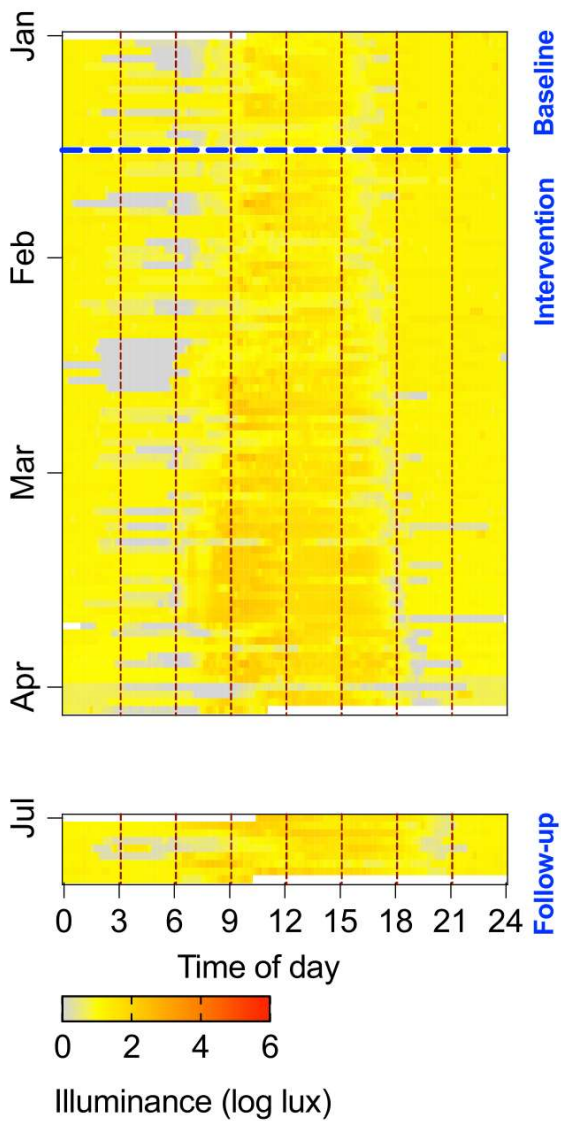

### Baseline

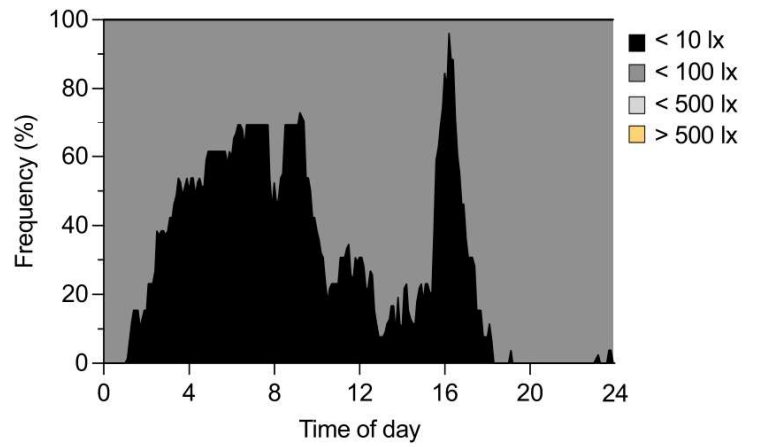

### Intervention

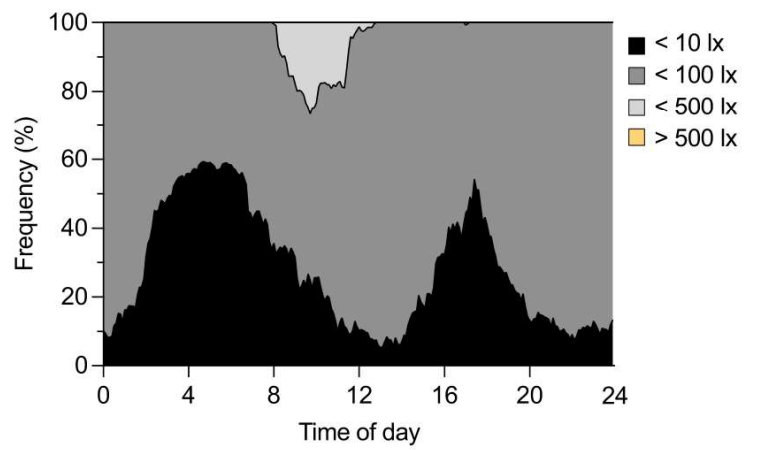

### Follow-up

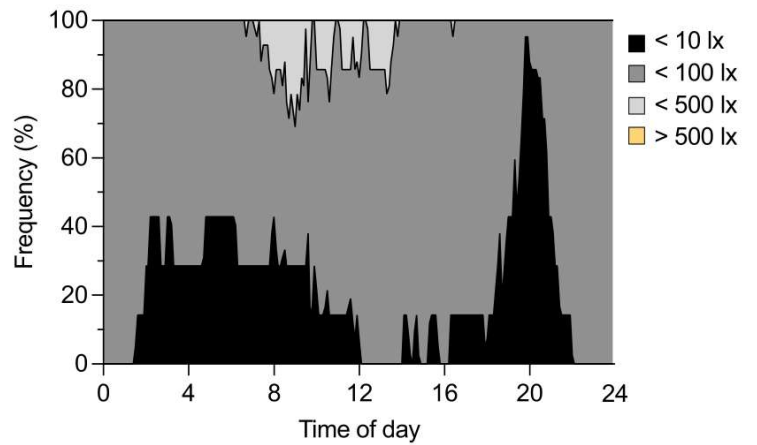

Supplement: Supplementary file 1 [file clockssleep-05-00048-s001.zip › S4 Passive monitored rest-activity and light exposure plots.pdf]
