# Supplementary material for: Light–Dark and Activity Rhythm Therapy (L-DART) to Improve Sleep in People with Schizophrenia Spectrum Disorders: A Single-Group Mixed Methods Study of Feasibility, Acceptability and Adherence
Source: Clocks Sleep. 2023 Dec 4;5(4):734–54. doi: 10.3390/clockssleep5040048 (PMC10742153; doi:10.3390/clockssleep5040048)
Supplement: Supplementary file 1 [file clockssleep-05-00048-s001.zip]

Archive with 4 entries (4 files):
- clockssleep-2657004-supplementary-S1.pdf
- clockssleep-2657004-supplementary-S2.pdf
- clockssleep-2657004-supplementary-S3.pdf
- S4 Passive monitored rest-activity and light exposure plots.pdf
